1  
2  
3  
4  
5  
6  
7  
8  
9  
10  
11  
12  
13  
14  
15  
16  
17  
18  
19  
20  
21  
22  
23  
24  
25  
26  
27  
28  
29

## Defining the functional significance of intergenic transcribed regions

John P. Lloyd<sup>1</sup>, Zing Tsung-Yeh Tsai<sup>2</sup>, Rosalie P. Sowers<sup>3</sup>, Nicholas L. Panchy<sup>4</sup>, Shin-Han Shiu<sup>1,4,5\*</sup>

<sup>1</sup> Department of Plant Biology, Michigan State University, East Lansing, MI 48824, USA

<sup>2</sup> Department of Computational Medicine and Bioinformatics, University of Michigan, Ann Arbor, MI 48109, USA

<sup>3</sup> Department of Biochemistry and Molecular Biology, Pennsylvania State University, University Park, PA 16802, USA

<sup>4</sup> Genetics Program, Michigan State University, East Lansing, MI 48824, USA

<sup>5</sup> Ecology, Evolutionary Biology, and Behavior Program, Michigan State University, East Lansing, MI 48824, USA

\* To whom correspondence should be addressed.

*Correspondence to:*

Shin-Han Shiu

Michigan State University

E-mail: shius@msu.edu

Telephone number: +1-517-353-7196

Running title: Functionality of intergenic transcripts

Keywords: Intergenic transcription, ncRNAs, definition of function, molecular evolution, machine learning, data integration

Author contributions: J.P.L., Z.T.-Y.T., and S.-H.S. designed the research. J.P.L., Z.T.-Y.T., R.P.S., and N.L.P. performed the research. J.P.L., Z.T.-Y.T., R.P.S., N.L.P., and S.-H.S. wrote the article.

30 **ABSTRACT**

31 With advances in transcript profiling, the presence of transcriptional activities in intergenic  
32 regions has been well established. However, whether intergenic expression reflects  
33 transcriptional noise or activity of novel genes remains unclear. We identified intergenic  
34 transcribed regions (ITRs) in 15 diverse flowering plant species and found that the amount of  
35 intergenic expression correlates with genome size, a pattern that could be expected if intergenic  
36 expression is largely nonfunctional. To further assess the functionality of ITRs, we first built  
37 machine learning classifiers using *Arabidopsis thaliana* as a model that accurately distinguish  
38 functional sequences (phenotype genes) and likely nonfunctional ones (pseudogenes and  
39 unexpressed intergenic regions) by integrating 93 biochemical, evolutionary, and sequence-  
40 structure features. Next, by applying the models genome-wide, we found that 4,427 ITRs (38%)  
41 and 796 annotated ncRNAs (44%) had features significantly similar to benchmark protein-  
42 coding or RNA genes and thus were likely parts of functional genes. Approximately 60% of  
43 ITRs and ncRNAs were more similar to nonfunctional sequences and were likely transcriptional  
44 noise. The predictive framework established here provides not only a comprehensive look at how  
45 functional, genic sequences are distinct from likely nonfunctional ones, but also a new way to  
46 differentiate novel genes from genomic regions with noisy transcriptional activities.  
47

## 48 INTRODUCTION

49 Advances in sequencing technology have helped to identify pervasive transcription in  
50 intergenic regions with no annotated genes. These intergenic transcripts have been found in  
51 metazoa and fungi, including human (ENCODE Project Consortium 2012), *Drosophila*  
52 *melanogaster* (Brown et al. 2014), *Caenorhabditis elegans* (Boeck et al. 2016), and  
53 *Saccharomyces cerevisiae* (Nagalakshmi et al. 2008). In plants, 7,000 to 15,000 intergenic  
54 transcripts have also been reported in *Arabidopsis thaliana* (Yamada et al. 2003; Stolc et al.  
55 2005; Moghe et al. 2013; Krishnakumar et al. 2015) and *Oryza sativa* (Nobuta et al. 2007). The  
56 presence of intergenic transcripts indicates that there may be additional genes in genomes that  
57 have escaped gene finding efforts thus far, including those that function as RNA genes (Simon  
58 and Meyers 2011; Guil and Esteller 2012; Fei et al. 2013; Tan et al. 2015). Meanwhile, it is also  
59 possible that some of these intergenic transcripts are products of un-regulated noise (Struhl  
60 2007). Given the functional significance of most intergenic transcripts remains unclear, the  
61 identification of functional intergenic transcribed regions (ITRs) represents a fundamental task  
62 that is critical to our understanding of genome evolution.

63 Loss-of-function study represents the gold standard by which the functional significance  
64 of genomic regions, including ITRs, can be confirmed (Ponting and Belgard 2010; Niu and Jiang  
65 2013). In *Mus musculus* (mouse), at least 25 ITRs with loss-of-function mutant phenotypes have  
66 been identified (Sauvageau et al. 2013; Lai et al. 2015). In human, 162 long intergenic non-  
67 coding RNAs harbor phenotype-associated SNPs (Ning et al. 2013). In addition to intergenic  
68 expression, most model organisms feature an abundance of annotated non-coding RNA (ncRNA)  
69 sequences (Zhao et al. 2016), which are mostly identified through the presence of transcriptional  
70 evidence occurring outside of annotated protein-coding genes. Thus, the only difference between  
71 ITRs and most ncRNA sequences is whether or not they have been annotated. Similar to the ITR  
72 examples above, a small number of ncRNAs have been confirmed as functional through loss-of-  
73 function experiments including *Xist* in mouse (Penny et al. 1996; Marahrens et al. 1997), *Malat1*  
74 in human (Bernard et al. 2010), *bereft* in *D. melanogaster* (Hardiman et al. 2002), and *At4* in *A.*  
75 *thaliana* (Shin et al. 2006).

76 However, the number of ITRs and ncRNAs with well-established functions is dwarfed by  
77 those without functional evidence. While some ITRs and ncRNAs can be novel genes, intergenic  
78 transcription may also be the byproduct of noisy transcription that can occur due to nonspecific

79 landing of RNA Polymerase II (RNA Pol II) or spurious regulatory signals that drive expression  
80 in random genomic regions (Struhl 2007). In the ENCODE project (ENCODE Project  
81 Consortium 2012), ~80% of the human genome was defined as biochemically functional as  
82 reproducible biochemical activities, e.g. transcription, could be detected. This has drawn  
83 considerable critique because the existence of a biochemical activity is not an indication of  
84 selection (Eddy 2013; Graur et al. 2013; Niu and Jiang 2013). Instead, it is advocated that a  
85 genomic region with discernible activity is only functional if it is under selection (Amundson and  
86 Lauder 1994; Graur et al. 2013; Doolittle et al. 2014). Under this “selected effect” functionality  
87 definition, ITRs and most annotated ncRNA genes remain functionally ambiguous.

88         Due to the debate on the definitions of function post-ENCODE, Kellis et al. (Kellis et al.  
89 2014) suggested that evolutionary, biochemical, and genetic evidences provide complementary  
90 information to define functional genomic regions. Consistent with this, integration of  
91 biochemical and conservation evidence was successful in identifying regions in the human  
92 genome that are under selection (Gulko et al. 2014) and classification of human disease genes  
93 and pseudogenes (Tsai et al. 2017). In this study, we adopt a similar framework to investigate the  
94 functionality of intergenic transcription in plants. We first identified ITRs in 15 flowering plant  
95 species with 17-fold genome size differences and evaluated the relationship between the  
96 prevalence of intergenic expression and genome size. Next, we established machine learning  
97 models using *A. thaliana* data to predict likely-functional ITRs and ncRNAs based on 93  
98 evolutionary, biochemical, and sequence-structure features. Finally, we applied the models to  
99 ITRs and annotated ncRNAs to determine whether these functionally ambiguous sequences are  
100 more similar to benchmark functional or likely nonfunctional sequences.

## 101 **RESULTS & DISCUSSION**

### 102 **Genome size versus prevalence of intergenic transcripts indicates ITRs may generally be** 103 **nonfunctional**

104         Transcription of an unannotated, intergenic region could be due to nonfunctional  
105 transcriptional noise or the activity of a novel gene. If noisy transcription occurs due to random  
106 landing of RNA Pol II or spurious regulatory signals, a naïve expectation is that, as genome size  
107 increases, the total nucleotides covered by ITRs would increase accordingly. By contrast, we  
108 expect that the extent of expression for genic sequences will not be significantly correlated with

109 genome size because larger plant genomes do not necessarily have more genes ( $r^2=0.01$ ;  
110  $p=0.56$ ).

111 To gauge if ITRs generally behave more like what we expect of noisy or genic  
112 transcription, we first identified genic and intergenic transcribed regions using leaf transcriptome  
113 data from 15 flowering plants with 17-fold differences in genome size (Supplementary Table 1).  
114 As expected, the coverage of expression originating from annotated genic regions had no  
115 significant correlation with genome size ( $r^2=0.03$ ;  $p=0.53$ ; **Fig. 1A**). By contrast, the coverage of  
116 intergenic expression was significantly and positively correlated ( $r^2=0.30$ ;  $p=0.04$ ; **Fig. 1B**),  
117 consistent with the interpretation that a significant proportion of intergenic expression represents  
118 transcriptional noise. However, the correlation between genome size and intergenic expression  
119 explained ~30% of the variation (**Fig. 1B**), suggesting that other factors also affect ITR content,  
120 including the possibility that some ITRs are truly functional, novel genes. To further evaluate the  
121 functionality of intergenic transcripts, we next identified the biochemical and evolutionary  
122 features of functional genic regions and tested whether intergenic transcripts in *A. thaliana* were  
123 more similar to functional or nonfunctional sequences.

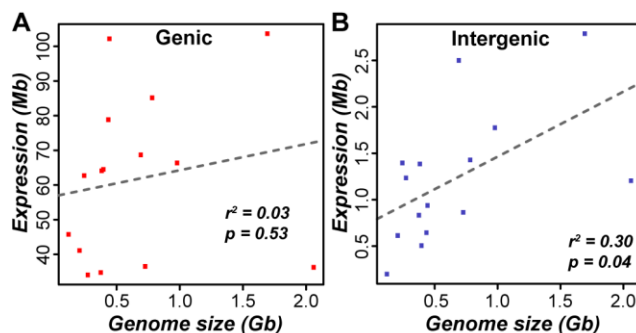

**Figure 1.** Relationship between genome size and number of nucleotides covered by RNA-seq reads (expression) in 15 flowering plant species. (A) annotated genic regions. (B) intergenic regions excluding any annotated features. Mb: megabase. Gb: gigabase. Dotted lines: linear model fits.  $r^2$ : square of Pearson's correlation coefficient.

124

## 125 **Benchmark functional protein-coding and nonfunctional genomic sequences are** 126 **significantly distinct in multiple features**

127 To determine whether intergenic transcripts resemble functional sequences, we first  
128 asked what features allow benchmark functional protein-coding and nonfunctional genomic  
129 regions to be distinguished in the model plant *Arabidopsis thaliana*. For benchmark functional

130 sequences, we used protein-coding genes with visible loss-of-function phenotypes when mutated  
131 (referred to as phenotype genes,  $n=1,876$ ; see Materials and Methods). Because their mutations  
132 have significant growth and/or developmental impact and likely contribute to reduced fitness,  
133 these phenotype genes can be considered functional under the selected effect definition (Neander  
134 1991). For benchmark nonfunctional genomic regions, we utilized pseudogene sequences  
135 ( $n=761$ ; see Materials and Methods). Considering that only 2% of pseudogenes are maintained  
136 over 90 million years of divergence between human and mouse (Svensson et al. 2006), it is  
137 expected that the majority of pseudogenes are no longer under selection (Li et al. 1981).

138 We evaluated 93 gene or gene product features for their ability to distinguish between  
139 phenotype genes and pseudogenes. These features were grouped into seven categories, including  
140 chromatin accessibility, DNA methylation, histone 3 (H3) marks, sequence conservation,  
141 sequence-structure, transcription factor (TF) binding, and transcription activity (Supplementary  
142 Table 2). We emphasize that no features were exclusive to protein-coding sequences. We used  
143 Area Under the Curve - Receiver Operating Characteristic (AUC-ROC) as a metric to measure  
144 how well a feature distinguished between phenotype genes and pseudogenes, which ranges  
145 between 0.5 (random guessing) and 1 (perfect separation of functional and nonfunctional  
146 sequences). Among the seven feature categories, transcription activity features were highly  
147 informative (median AUC-ROC=0.88; **Fig. 2A**). Despite the strong performance of transcription  
148 activity-related features, the presence of expression (i.e. transcript evidence) was a poor predictor  
149 of functionality (AUC-ROC=0.58; **Fig. 2A**). This is because 80% of pseudogenes were  
150 considered expressed in  $\geq 1$  of 51 RNA-seq datasets, demonstrating that presence of transcripts  
151 should not be used by itself as evidence of functionality. Sequence conservation, DNA  
152 methylation, TF binding, and H3 mark features were also fairly distinct between phenotype  
153 genes and pseudogenes (median AUC-ROC  $\sim 0.7$  for each category; **Fig. 2B-E**). By contrast,  
154 chromatin accessibility and sequence-structure features were largely uninformative (median  
155 AUC-ROC=0.51 and 0.55, respectively; **Fig. 2F,G**). We also observed high performance  
156 variability within feature categories (see Supplementary Information). While many features are  
157 distinct between phenotype genes and pseudogenes, functional predictions based on single  
158 features yield high error rates (Supplementary Table 3; Supplementary Information), indicating a  
159 need to jointly consider multiple features for distinguishing phenotype genes and pseudogenes.

160

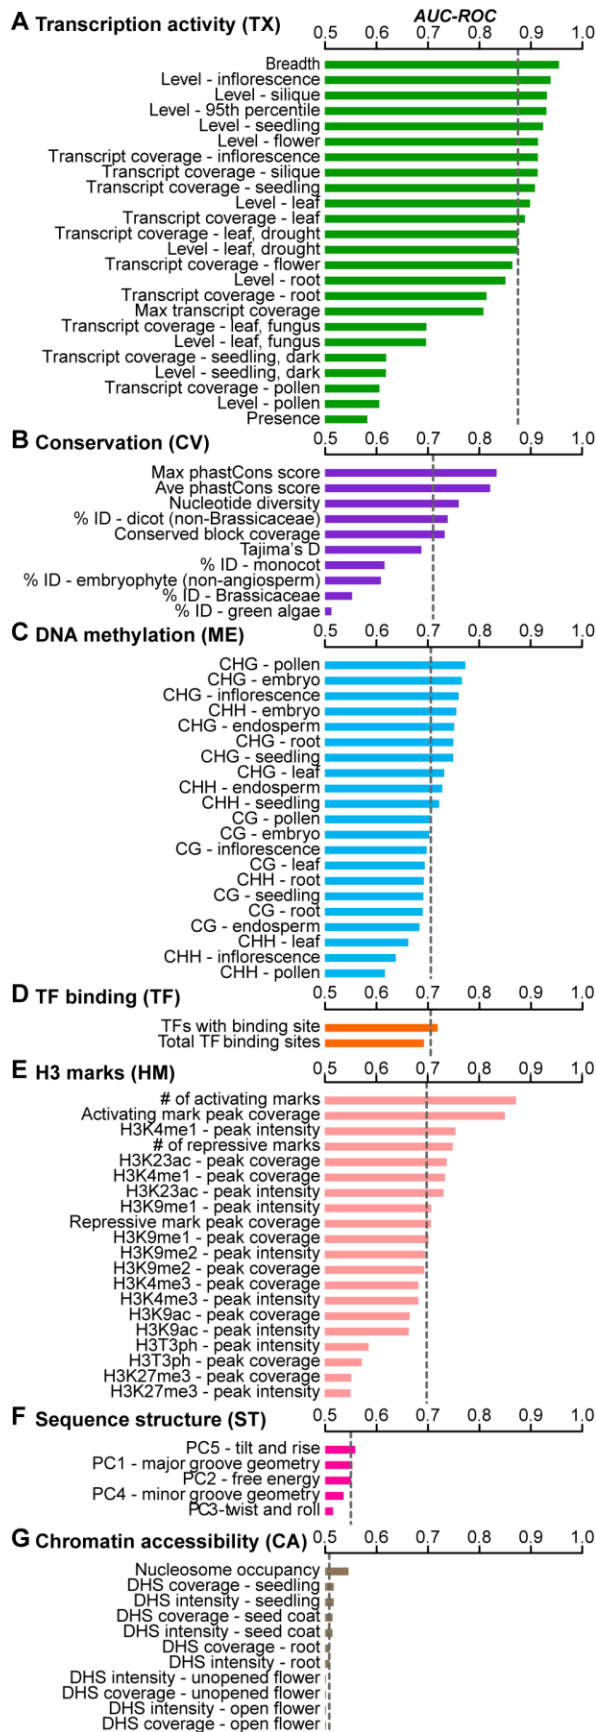

**Figure 2.** Predictions of functional (phenotype gene) and non-functional (pseudogene) sequences based on each individual feature. Prediction performance is measured using Area Under the Curve - Receiver Operating Characteristic (AUC-ROC). Features include those in the categories of (A) transcription activity, (B) sequence conservation, (C) DNA methylation, (D) transcription factor (TF) binding, (E) histone 3 (H3) marks, (F) sequence structure, and (G) chromatin accessibility. AUC-ROC ranges in value from 0.5 (equivalent to random guessing) to 1 (perfect predictions). Dotted lines: median AUC-ROC of features in a category.



162 **Consideration of multiple features produces accurate predictions of functional genomic**  
163 **regions**

164 To consider multiple features in combination, we instead integrated all 93 features to  
165 establish a machine learning model distinguishing phenotype gene and pseudogenes (referred to  
166 as the full model; see Materials and Methods). The full model provided more accurate  
167 predictions (AUC-ROC=0.98; False Negative Rate (FNR)=4%; False Positive Rate (FPR)=10%;  
168 **Fig. 3A**) than any individual feature (**Fig. 2**; Supplementary Fig. 1, Supplementary Table 3). An  
169 alternative measure of performance based on the precision (proportion of predicted functional  
170 sequences that are truly functional) and recall (proportion of truly functional sequences predicted  
171 correctly) values also indicated that the model was performing well (**Fig. 3B**). When compared  
172 to the best-performing single feature (expression breadth), the full model had a similar FNR but  
173 half the FPR (10% compared to 21%). Thus, the full model is highly capable of distinguishing  
174 between phenotype genes and pseudogenes.

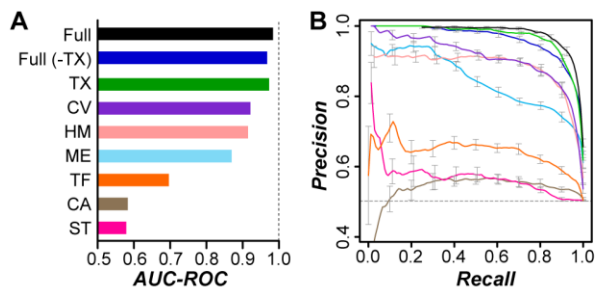

**Figure 3.** Predictions of functional and nonfunctional sequences based on multiple features. (*A*) AUC-ROC values of function prediction models built when considering all features (Full), all except transcription activity (TX)-related features (Full (-TX)), and all features from each category. The category abbreviations follow those in **Fig. 2**. (*B*) Precision-recall curves of the models with matching colors from (*A*). The models were built using feature values calculated from 500 bp sequence windows. We also conducted principle component (PC) analysis to investigate how well phenotype genes and pseudogenes could be separated and found that phenotype genes (Supplementary Fig. 1A) and pseudogenes (Supplementary Fig. 1B) were distributed in largely distinct space. However, there remained substantial overlap, indicating that standard parametric approaches are not well suited to distinguishing between benchmark functional and nonfunctional sequences.

175  
176 We next determined the relative contributions of different feature categories in predicting  
177 phenotype genes and pseudogenes and established seven prediction models each using only the  
178 subset of features from a single category (**Fig. 2**). Although none of these category-specific  
179 models had performance as high as the full model (**Fig. 3C**), the transcription activity feature



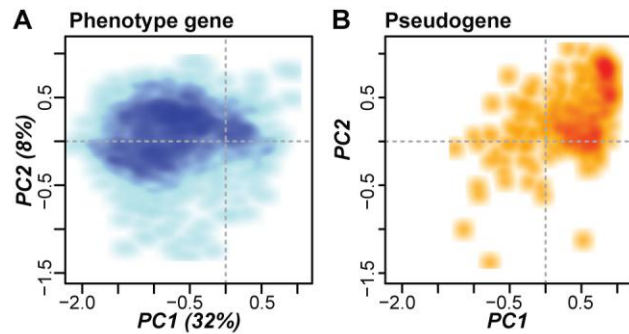

**Supplementary Figure 1.** Smoothed scatterplots of the first two principle components (PCs) of (A) phenotype gene and (B) pseudogene features. The percentages on the axes in (A) indicate the feature value variation explained by the associated PC.

180  
181 category model performed almost as well as the full model (AUC-ROC=0.97, FNR=6%,  
182 FPR=12%). Instead of the presence of expression evidence, the breadth and level of transcription  
183 are the causes of the strong performance of the transcription activity-only model. We also found  
184 that a model excluding transcription activity features (full (-TX), **Fig. 3C,D**) performed almost as  
185 well as the full model and similarly to the transcription activity-feature-only model, but with an  
186 increased FPR (AUC-ROC=0.96; FNR=3%; FPR=20%). These findings indicate that a diverse  
187 array of features can be considered jointly to make highly accurate predictions of the  
188 functionality of a genomic sequence. Meanwhile, our finding of the high performance of the  
189 transcription activity-only model highlights the possibility of establishing an accurate model for  
190 functional prediction in species with only a modest amount of transcriptome data.

### 191 **The functional likelihood measure can be used to classify functional and non-functional** 192 **sequences**

193 To provide a measure of the potential functionality of any sequence in the *A. thaliana*  
194 genome, including ITRs and ncRNAs, we utilized the confidence score from the full model as a  
195 “functional likelihood” value (Tsai et al. 2017). The functional likelihood (FL) score ranges  
196 between 0 and 1, with high values indicating that a sequence is more similar to phenotype genes  
197 (functional) and low values indicating a sequence more closely resembles pseudogenes  
198 (nonfunctional). FL values for all genomic regions examined in this study are available in  
199 Supplementary Table 4. As expected, phenotype genes had high FL values (median=0.97; **Fig.**  
200 **4A**) and pseudogenes had low values (median=0.01; **Fig. 4B**). To call sequences as functional or  
201 not, we defined a threshold FL value (0.35) by maximizing the F-measure (see Materials and

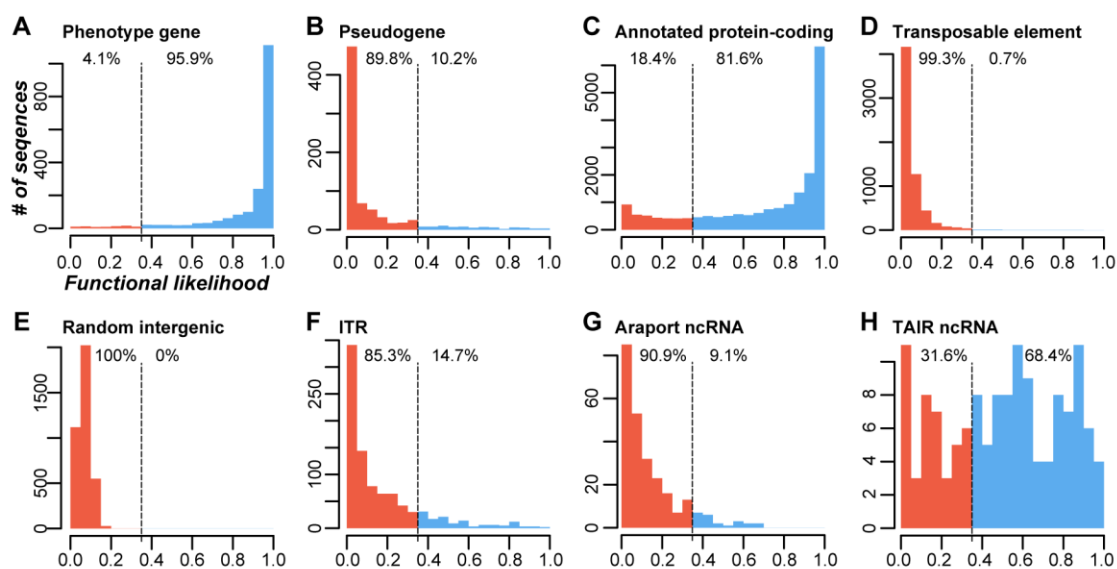

**Figure 4.** Functional likelihood distributions of various sequence classes based on the full model. (A) Phenotype genes. (B) Pseudogenes. (C) Annotated protein-coding genes. (D) Transposable elements. (E) Random unexpressed intergenic sequences. (F) Intergenic transcribed regions (ITR). (G) Araport11 ncRNAs. (H) TAIR10 ncRNAs. The full model was established using 500 bp sequence windows. Higher and lower functional likelihood values indicate greater similarity to phenotype genes and pseudogenes, respectively. Vertical dashed lines indicate the threshold for calling a sequence as functional or nonfunctional. The percentages to the left and right of the dashed line indicate the percent of sequences predicted as functional or nonfunctional, respectively.

202

203 Methods). Using this threshold, 96% of phenotype genes (**Fig. 4A**) and 90% of pseudogenes  
 204 (**Fig. 4B**) are correctly classified as functional and nonfunctional, respectively, demonstrating  
 205 that the full model is highly capable of distinguishing functional and nonfunctional sequences.

206 We next applied our model to predict the functionality of annotated protein-coding genes,  
 207 transposable elements (TEs), and unexpressed intergenic regions. Most annotated protein-coding  
 208 genes not included in the phenotype gene dataset had high FL scores (median=0.86; **Fig. 4C**) and  
 209 80% were predicted as functional. The features exhibited by low-scoring protein-coding genes  
 210 and high-scoring pseudogenes are discussed in the Supplementary Information. By contrast, the  
 211 FLs were low for both TEs (median=0.03, **Fig. 4D**) and unexpressed intergenic regions  
 212 (median=0.07; **Fig. 4E**), and 99% of TEs and all unexpressed intergenic sequences were  
 213 predicted as nonfunctional. Overall, the FL measure provides a useful metric to distinguish  
 214 between phenotype genes and pseudogenes. In addition, the FLs of annotated protein-coding  
 215

216 genes, TEs, and unexpressed intergenic sequences agree with *a priori* expectations regarding the  
 217 functionality of these sequences.

## 218 Most ITRs and annotated ncRNAs do not resemble benchmark phenotype genes

219 We next evaluated functional predictions of ITRs and ncRNAs. Consistent with previous  
 220 studies (Moghe et al. 2013), ITRs and ncRNAs in our dataset were more narrowly and weakly  
 221 expressed and less conserved compared to phenotype genes (Supplementary Fig. 2A,B). In  
 222 addition, ITRs in particular had biochemical characteristics that were generally more similar to  
 223 pseudogenes (Supplementary Fig. 2C-F). Given the association between transcription activity

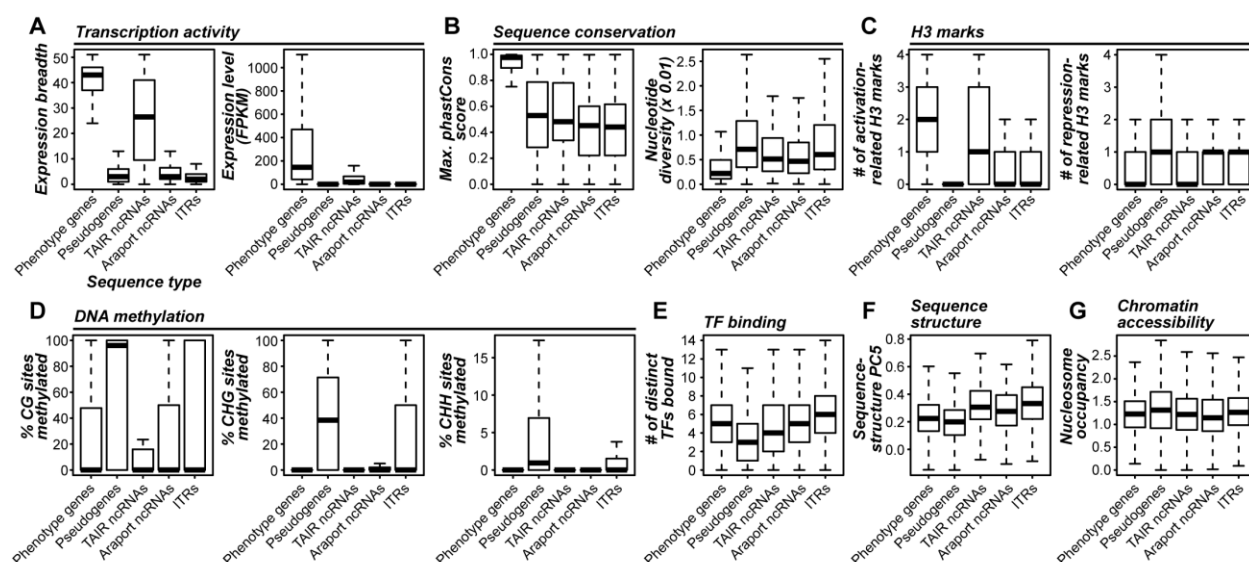

224 **Supplementary Figure 2.** Distributions of 12 example features from (A) transcription activity, (B)  
 225 sequence conservation, (C) histone 3 (H3) marks, (D) DNA methylation, (E) transcription factor (TF)  
 226 binding, (F) sequence structure, and (G) chromatin accessibility feature categories (Fig. 2). Feature  
 227 distributions are shown for phenotype genes, pseudogenes, TAIR- and Araport-annotated ncRNAs and  
 228 intergenic transcribed regions (ITR).

229 features and functional predictions (**Fig 2A; Fig. 3A**), we investigated how functional prediction  
 230 models performed for conditionally-functional and narrowly-expressed sequences before  
 231 applying them to ITRs and ncRNAs. We found that genes with conditional phenotypes had no  
 significant differences in FLs (median=0.96) as those with phenotypes under standard growth  
 conditions (median=0.97; U test,  $p=0.38$ , Supplementary Fig. 3A), indicating the full model can  
 capture conditionally functional sequences. However, the full model is biased against narrowly-  
 expressed ( $\leq 3$  tissues) phenotype genes as 65% of them were predicted as nonfunctional

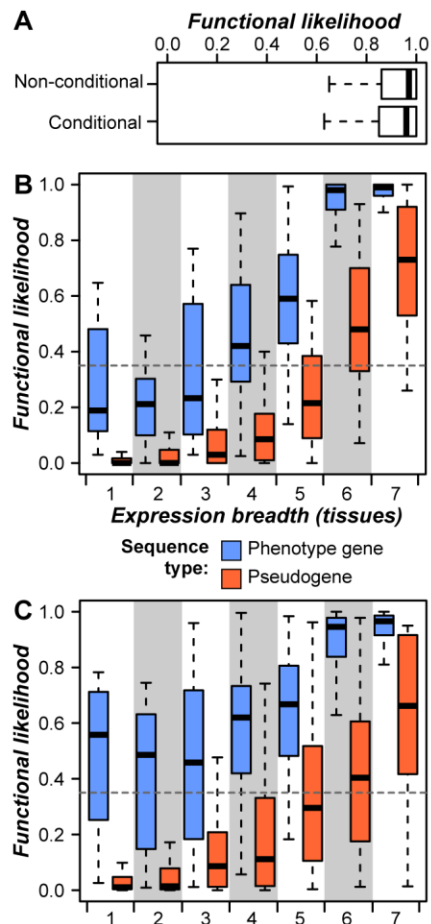

**Supplementary Figure 3.** Impacts of conditional phenotypes and expression breadth on the function prediction model. (A) Functional likelihood distributions of phenotype genes with mutant phenotypes under standard growth conditions (non-conditional) and non-standard growth conditions such as stressful environments (conditional) based on the 500 bp full model. Feature values were calculated from a random 500 bp region from within the sequence body. Higher and lower functional likelihood values indicate a greater similarity to phenotype genes and pseudogenes, respectively. (B,C) Distributions of functional likelihood scores for phenotype genes (blue) and pseudogenes (red) for sequences with various breadths of expression for (B) the 500 bp full model and (C) the 500 bp tissue-agnostic model generated by excluding the expression breadth and features available from multiple tissues. The tissue-agnostic model is aimed toward minimizing the effects of biochemical activity occurring across multiple tissues and predicts a greater proportion of narrowly-expressed phenotype genes as functional compared to the full model.

232

233 (Supplementary Fig. 3B). Further, pseudogenes that were more highly and broadly expressed

234 were disproportionately predicted as functional (**Fig. 5**; Supplementary Fig. 3B). To tailor

235 functional predictions to narrowly-expressed sequences, particularly ITRs and ncRNAs, we

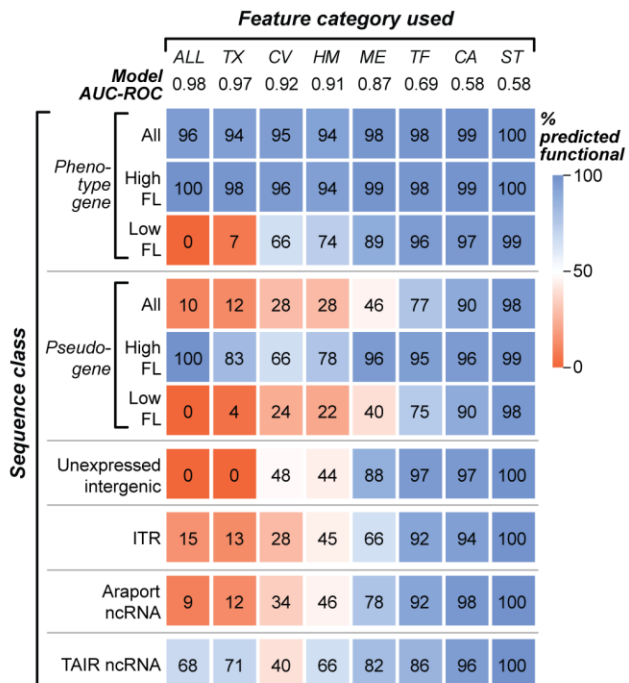

**Figure 5.** Proportion of phenotype genes, pseudogenes, ITRs, and ncRNAs predicted as functional in the full and single-category models. Percentages of sequence classes that are predicted as functional in models based on all features and the single category models, each using all features from a category (abbreviated according to **Fig. 2**). The models are sorted from left to right based on performance (AUC-ROC). The colors of and numbers within the blocks indicate the proportion sequences predicted as functional by a given model. Phenotype gene and pseudogene sequences are shown in three sub-groups: all sequences (All), and those predicted as functional (high functional likelihood (FL)) and nonfunctional (low FL) in the full model. ITR: intergenic transcribed regions. A greater proportion of ITRs and Araport ncRNAs are predicted as functional when considering only DNA methylation or H3 mark features compared to the full (**Fig. 3**) or tissue-agnostic (Supplementary Fig. 5) models. However, these two category-specific models also had higher false positive rates (unexpressed intergenic sequences and pseudogenes). Thus, these single feature-category models do not provide additional support for the functionality of most Araport ncRNAs and ITRs.

236

237

238

239

240

241

242

243

generated a “tissue-agnostic” model by excluding expression breadth and features available across multiple tissues (see Materials and Methods). This tissue-agnostic model performed similarly to the full model (AUC-ROC=0.97; FNR=4%; FPR=15%; Supplementary Fig. 4; Supplementary Table 4), although there was a 5% increase in FPR (from 10% to 15%).

Importantly, the proportion of phenotype genes expressed in  $\leq 3$  tissues predicted as functional increased by 23% (35% in the full model to 58% in the tissue-agnostic model; Supplementary



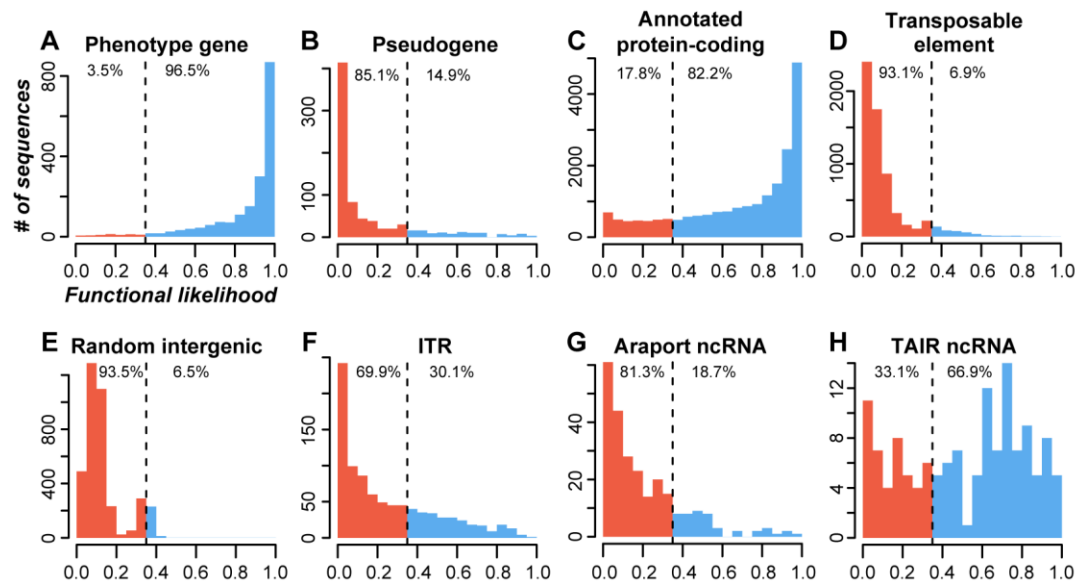

**Supplementary Figure 4.** Distributions of functional likelihood scores based on the 500 bp tissue-agnostic model. (A) Phenotype genes. (B) Pseudogenes. (C) Annotated protein-coding genes. (D) Transposable elements. (E) Random unexpressed intergenic sequences. (F) Intergenic transcribed regions (ITR). (G) Araport11 ncRNAs. (H) TAIR10 ncRNAs. Vertical dashed lines display the threshold to define a sequence as functional or nonfunctional. The numbers to the left and right of the dashed line show the percentage of sequences predicted as functional or nonfunctional, respectively.

244

245 Fig. 3C), indicating that the tissue-agnostic model is more suitable for predicting the

246 functionality of narrowly-expressed sequences than the full model.

247

248 We next applied both the full and tissue-agnostic models to 895 ITRs, 136 ncRNAs  
 249 annotated by The Arabidopsis Information Resource (TAIR), and 252 long ncRNAs annotated  
 250 by the Araport database that do not overlap with any other annotated genome features. The  
 251 median FLs based on the full model were low (0.09) for both ITRs (**Fig. 4F**) and Araport  
 252 ncRNAs (**Fig. 4G**), and only 15% and 9% of these sequences were predicted as functional,  
 253 respectively. By contrast, TAIR ncRNAs had a significantly higher median FL value (0.53; U  
 254 tests, both  $p < 5e-31$ ; **Fig. 4H**) and 68% were predicted as functional, which is best explained by  
 255 differences in features from the transcription activity category (**Fig. 5**). We also note that ITRs  
 256 and annotated ncRNAs that were close to genes were more frequently predicted as functional,  
 257 suggesting a subset may represent unannotated exons of known genes (Supplementary Fig. 5;  
 258 Supplementary Information). Next we applied the tissue-agnostic model to ITRs and  
 TAIR/Araport ncRNAs. Compared to the full model, around twice as many ITRs (30%) and



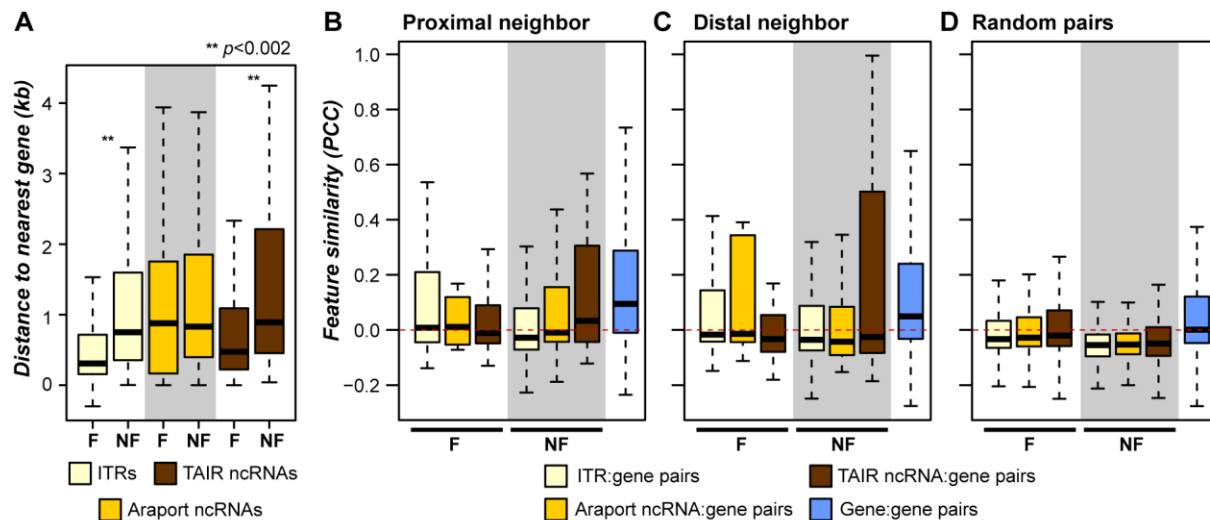

**Supplementary Figure 5.** Distance of ITRs and annotated ncRNA regions to and feature similarity with neighboring genes. (A) Distance from intergenic transcribed regions (ITRs) and annotated ncRNAs to the closest neighboring gene. ITR and ncRNA sequences are separated by whether they are predicted as functional (F) or nonfunctional (NF) by the 500 bp full model. (B) Feature similarity between proximal neighbors (within 95th percentile (456 bp) of intron lengths), and (C) distal neighbors (>456 bp). Pairs involving ITRs and annotated ncRNAs were divided by whether the ITR or ncRNA sequence was predicted as functional (F) or nonfunctional (NF) by the full model. Feature values were quantile normalized prior to calculating correlations. (D) Feature similarity based on Pearson's Correlation Coefficients (PCC) between random pairs of ITRs, Araport11 ncRNAs, TAIR10 ncRNAs, or annotated genes.

259

260 Araport ncRNAs (19%) but a similar number of TAIR ncRNA (67%) were predicted as  
 261 functional. Considering the union of the full and tissue-agnostic model predictions, 268 ITRs  
 262 (32%), 57 Araport ncRNAs (23%), and 105 TAIR ncRNAs (77%) were likely functional. Thus,  
 263 the majority of ITRs and Araport ncRNAs are more similar to pseudogenes than to phenotype  
 264 genes that are predominantly protein coding.

### 265 **Benchmark protein-coding and RNA genes exhibit distinct characteristics**

266 We demonstrated that the majority of ITR and annotated ncRNA sequences do not  
 267 exhibit characteristics of benchmark phenotype genes. Note that the phenotype genes are  
 268 predominantly protein coding. Although the features utilized to generate functional predictions  
 269 were not exclusive to protein-coding sequences, RNA genes may exhibit a distinct feature profile  
 270 from protein-coding genes. The full and tissue agnostic models described above were established

271 with 500 bp windows and most known RNA genes are too short to be considered by these  
272 models. Thus, to evaluate functional predictions among annotated RNA genes, we generated a  
273 new tissue-agnostic model using 100 bp sequences (for features, see Supplementary Table 6) that  
274 performed similarly to the full 500 bp model, except with 9% higher FNR (AUC-ROC=0.97;  
275 FNR=13%; FPR=5%; Supplementary Fig. 6). With this new tissue agnostic model, 50% (three  
276 out of six) of RNA genes with documented mutant phenotypes (phenotype RNA genes) were  
277 predicted as functional (Supplementary Fig. 6I). We also applied this model to other RNA Pol II-  
278 transcribed RNA genes (without documented phenotypes) and found that 15% of microRNA  
279 (miRNA) primary transcripts (Supplementary Fig. 6J), 73% of small nucleolar RNAs (snoRNAs;  
280 Supplementary Fig. 6K), and 50% of small nuclear RNAs (snRNAs; Supplementary Fig. 6L)  
281 were predicted as functional. Although the proportion of phenotype RNA genes predicted as  
282 functional (50%) is significantly higher than the proportion of pseudogenes predicted as  
283 functional (5%, FET,  $p < 0.004$ ), this finding suggests that a model trained using protein-coding  
284 genes has a substantial FNR for detecting RNA genes.

285 To determine whether the suboptimal predictions by the phenotype protein-coding gene-  
286 based models are because RNA genes belong to a class of their own, we next built a multi-class  
287 function prediction model (as opposed to the binary, two-class models described above) aimed at  
288 distinguishing four classes of sequences: benchmark RNA genes (n=46, Supplementary Table 6),  
289 , phenotype protein-coding genes (1,882), pseudogenes (3,916), and randomly-selected,  
290 unexpressed intergenic regions (4,000). In the four-class model, 87% of benchmark RNA genes,  
291 including all six phenotype RNA genes, were predicted as functional sequences (65% RNA  
292 gene-like and 22% phenotype protein-coding gene-like; **Fig. 6A**). In addition, 95% of phenotype  
293 protein-coding genes were predicted as functional (**Fig. 6B**), including 80% of narrowly  
294 expressed genes, an increase of 22% over the 500 bp tissue-agnostic model (Supplementary Fig.  
295 3C). For benchmark non-functional sequences, 70% of pseudogenes (**Fig. 6C**) and 100% of  
296 unexpressed intergenic regions (**Fig. 6D**) were predicted as nonfunctional (either as pseudogenes  
297 or unexpressed intergenic sequences). Overall, the four-class model improves prediction  
298 accuracy of RNA genes and narrowly expressed genes. In addition, given the 30% FPR among  
299 pseudogenes, the four-class model provides a liberal estimate of sequence functionality and high  
300 confidence estimate of non-functionality.

301

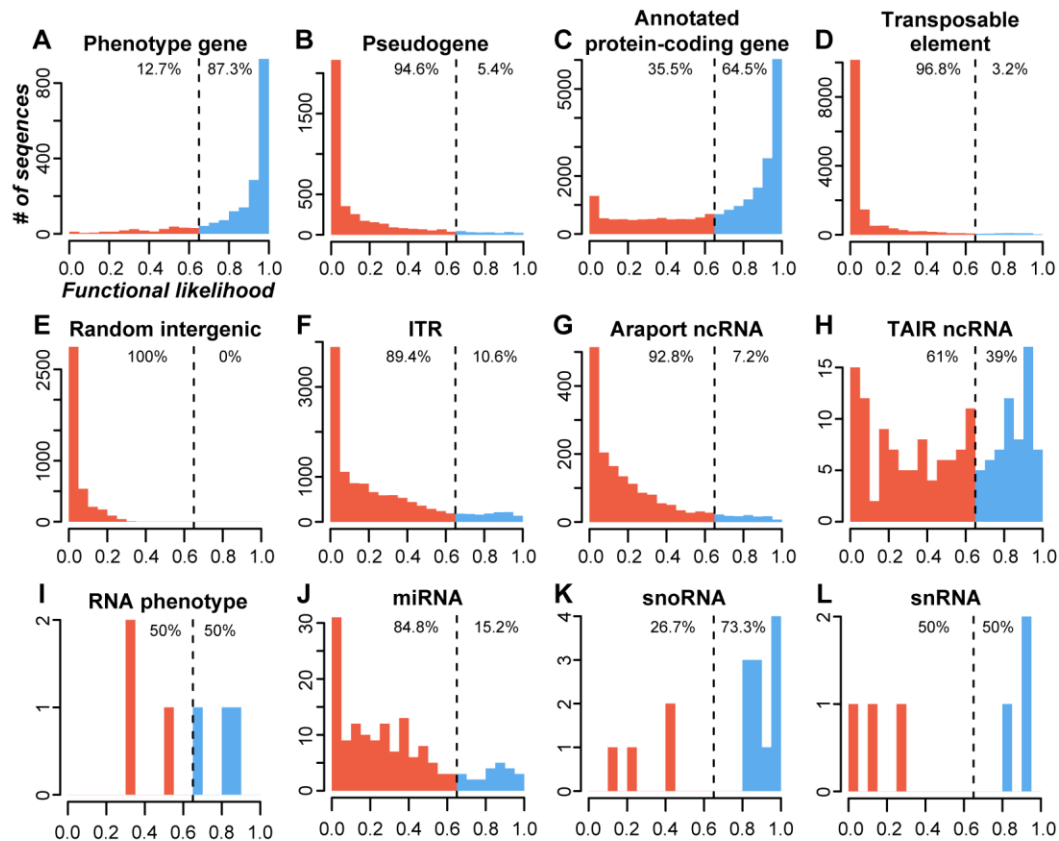

**Supplementary Figure 6.** Distributions of functional likelihood scores based on the 100 bp tissue-agnostic model. (A) Phenotype genes. (B) Pseudogenes. (C) Protein-coding gene. (D) transposable elements. (E) Random unexpressed intergenic sequences. (F) Intergenic transcribed regions (ITR). (G) Araport11 ncRNAs. (H) TAIR10 ncRNAs. (I) RNA genes with loss-of-function mutant phenotypes. (J) MicroRNAs, (K) Small nucleolar RNAs, (L) Small nuclear RNAs. The tissue-agnostic model was built with 100 bp features and while excluding the expression breadth and tissue-specific features as annotated RNA genes tend to be more narrowly expressed than phenotype genes (U tests, all  $p < 2e-05$ ; Supplementary Fig. 2A). Higher functional likelihood values indicate greater similarity to phenotype genes while lower values indicate similarity to pseudogenes. Vertical dashed lines display the threshold to define a sequence as functional or nonfunctional. The numbers to the left and right of the dashed line show the percentage of sequences predicted as functional or nonfunctional, respectively.

302

### 303 **Most intergenic transcribed regions and annotated ncRNAs do not resemble benchmark** 304 **RNA genes**

305 By applying the four-class model on ITRs and annotated ncRNAs, we found that 34% of  
306 ITRs, 38% of Araport ncRNAs, and of 65% TAIR ncRNAs were predicted as functional  
307 sequences (**Fig. 6E-G**). Specifically,  $\leq 20\%$  of ITR and annotated ncRNA sequences were

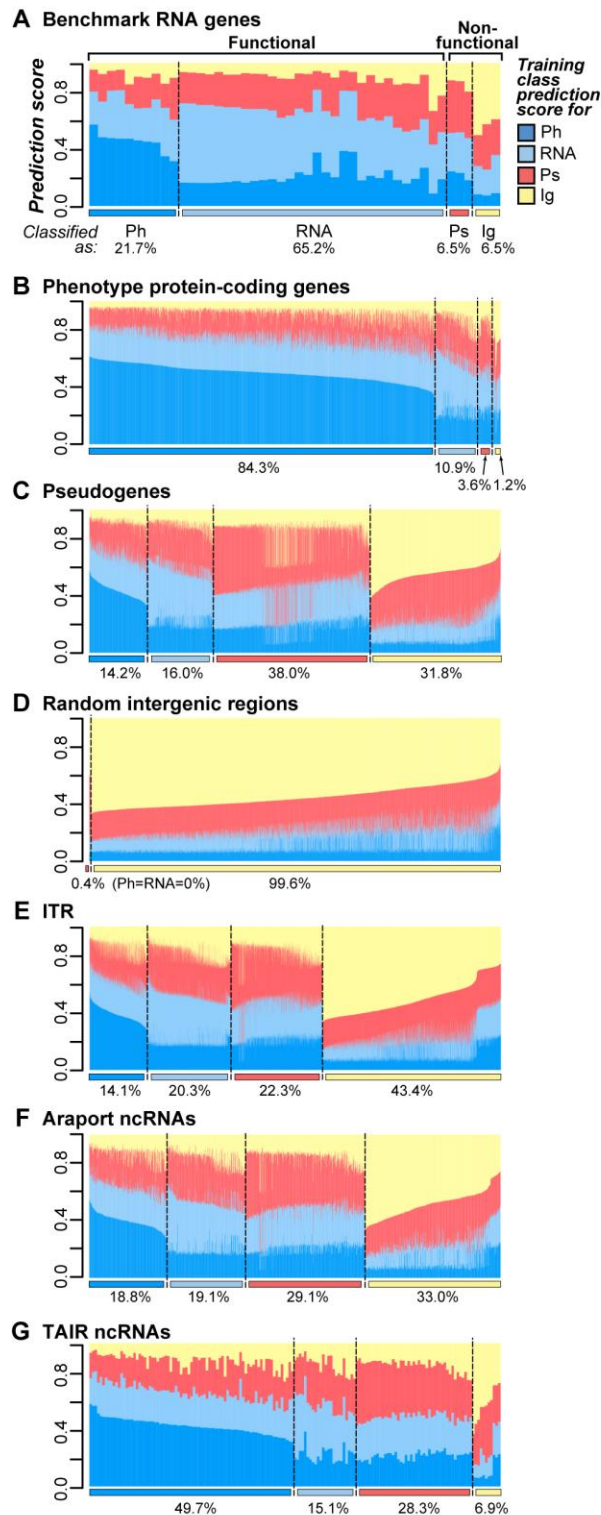

**Figure 6.** Function predictions based on a four-class prediction model. **(A)** Stacked bar plots indicate the prediction scores of benchmark RNA genes for each of the four classes: dark blue - phenotype protein-coding gene (Ph), cyan - RNA gene (RNA), red - pseudogene (Ps), yellow – random intergenic sequence (Ig). Ig were included to provide another set of likely nonfunctional sequences distinct from pseudogenes. Expression breadth and tissue-specific features were excluded and 100 bp sequences were used. A benchmark RNA gene is classified as one of the four classes according to the highest prediction score. The color bars below the chart indicate the predicted class, with the same color scheme as the prediction score. Sequences classified as Ph or RNA were considered functional, while those classified as Ps or Ig were considered nonfunctional. Percentages below a classification region indicate the proportion of sequences classified as that class. **(B)** Phenotype protein-coding gene prediction scores. **(C)** Pseudogene prediction scores. **(D)** Random unexpressed intergenic region prediction scores. Note that no sequence was predicted as functional. **(E)** Intergenic transcribed region (ITR), **(F)** Araport11 ncRNA regions. **(G)** TAIR10 ncRNA regions. Note that the 100 bp model used here allowed us to evaluate an additional 10,938 ITRs and 1,406 annotated ncRNAs compared to the 500 bp full and tissue-agnostic models.

308

309 classified as RNA genes (**Fig. 6E-G**). Although miRNAs dominate the benchmark RNA

310 sequences, we should emphasize that the four-class prediction model also increased the

311 proportion of snoRNAs and snRNAs that were predicted as functional (91%) compared to the



312 100bp tissue agnostic model (67%). Thus a lack of similarity to benchmark miRNAs provides  
313 evidence that most ITRs and Araport ncRNAs are not functioning as RNA genes.

314 To provide an overall estimate of the proportion of likely functional and nonfunctional  
315 ITRs and annotated ncRNAs, we considered the predictions from the four-class model (**Fig. 6**),  
316 the full model (**Fig. 3,4**), and the tissue-agnostic models (Supplementary Fig. 4, 6), which cover  
317 both protein-coding and RNA gene functions. Based on support from  $\geq 1$  of the four models, we  
318 classified 4,437 ITRs (38%) and 796 annotated ncRNAs (44%) as likely functional, as they  
319 resembled either phenotype protein-coding or RNA genes. Although our findings lend support  
320 that they are likely parts of novel or annotated genes, we should stress that, given the relatively  
321 high FPR in the tissue-agnostic and four-class models, the estimate of functional ITR/ncRNA is  
322 a liberal one. Most importantly, we find that a substantial number of ITRs (62%) and annotated  
323 ncRNAs (56%) are predicted as nonfunctional. Moreover, at least a third of ITRs (**Fig. 6E**) and  
324 Araport ncRNAs (**Fig. 6F**) most closely resemble unexpressed intergenic regions. Based on these  
325 findings, we conclude that the majority of ITRs and annotated ncRNA regions resemble  
326 nonfunctional genomic regions, and therefore are derived from noisy transcription.

## 327 **CONCLUSION**

328 Discerning the location of functional regions within a genome represents a key goal in  
329 genomic biology and is fundamental to molecular evolutionary studies. Despite advances in  
330 computational gene finding, it remains challenging to determine whether ITRs represent  
331 functional or noisy biochemical activity. We established robust function prediction models based  
332 on the evolutionary, biochemical, and structural characteristics of phenotype genes and  
333 pseudogenes in *A. thaliana*. The prediction models accurately define functional and  
334 nonfunctional regions and are applicable genome-wide and echo recent findings using human  
335 data to evaluate RNA gene functionality (Tsai et al. 2017). We utilized prediction models to  
336 assess the functionality of both protein-coding and annotated RNA genes. As benchmark  
337 examples of more recently identified RNA gene classes become available in *A. thaliana*, such as  
338 *cis*-acting regulatory (Guil and Esteller 2012) or competitive endogenous (Tan et al. 2015)  
339 RNAs, it will be interesting to see if sequences that encode RNA products with these roles can be  
340 predicted as functional based on a similar predictive framework. Given that function predictions  
341 were successful in both plants and metazoans, integrating the evolutionary and biochemical

342 features of known genes for functional genomic region prediction will likely be applicable to any  
343 species. The next step will be to test whether function prediction models can be applied across  
344 species, which could ultimately allow the phenotype data and omics resources available in model  
345 systems to effectively guide the identification of functional regions in non-models.

346 Expression data was highly informative to functional predictions. We found that the  
347 prediction model based on only 24 transcription activity-related features performs nearly as well  
348 as the full model that integrates additional information including conservation, H3 mark,  
349 methylation, and TF binding data. In human, use of transcription data from cell lines also  
350 produced highly accurate predictions of functional genomic regions (Tsai et al. 2017).  
351 Importantly, our findings suggest that function prediction models can be established in any  
352 species, model or not, with a modest number of transcriptome datasets (e.g. 51 in this study and  
353 19 in human). Despite the importance of transcription data, we emphasize that the presence of  
354 expression evidence is an extremely poor predictor of functionality. With the effectiveness of our  
355 model noted, one major caveat of our models is that narrowly-expressed phenotype genes are  
356 frequently predicted as pseudogene and broadly-expressed pseudogenes tend to be called  
357 functional. To improve the function prediction model, it will be important to explore additional  
358 features unrelated to transcription, particularly those relevant to broadly expressed pseudogenes  
359 that are mostly likely recently pseudogenized. In addition, because few phenotype genes are  
360 narrowly-expressed (5%) in the *A. thaliana* training data, more phenotyping data for narrowly  
361 expressed genes will be crucial as well.

362 Upon application of the function prediction models genome-wide, 4,427 ITRs and 796  
363 annotated ncRNAs in *A. thaliana* are predicted as functional sequences. However, considering  
364 the high false positive rates (e.g. 10% for the full and 31% for the four-class model), this is most  
365 likely an overestimate of the functional sequences contributed by ITRs and annotated ncRNAs.  
366 While we err on the side of calling non-functional sequences as functional, we reduce the error  
367 rate for calling a functional sequence as non-functional. Despite this conservative approach to  
368 classifying sequences as non-functional, the majority of ITRs and ncRNAs resemble  
369 pseudogenes and random unexpressed intergenic regions. Similarly, most human ncRNAs are  
370 more similar to nonfunctional sequences than they are to protein coding and RNA genes (Tsai et  
371 al. 2017). Together with our finding of a significant relationship between the amount of  
372 intergenic expression and genome size, we conclude that a significant proportion of intergenic



373 transcripts are nonfunctional noise. Thus, instead of assuming any expressed sequence must be  
374 functionally significant, we advocate that the null hypothesis should be that it is not, particularly  
375 considering that most ITRs and annotated ncRNAs have not been experimentally characterized.

## 376 **MATERIALS AND METHODS**

### 377 **Identification of transcribed regions in leaf tissue of 15 flowering plants**

378 RNA-sequencing (RNA-seq) datasets were retrieved from the Sequence Read Archive  
379 (SRA) at the National Center for Biotechnology Information (NCBI;  
380 [www.ncbi.nlm.nih.gov/sra/](http://www.ncbi.nlm.nih.gov/sra/)) for 15 flowering plant species (Supplementary Table 1). All datasets  
381 were generated from leaf tissue and sequenced on Illumina HiSeq 2000 or 2500 platforms.  
382 Genome sequences and gene annotation files were downloaded from Phytozome v.11  
383 ([www.phytozome.net](http://www.phytozome.net)) (Goodstein et al. 2012) or Oropetium Base v.01 ([www.sviridis.org](http://www.sviridis.org))  
384 (VanBuren et al. 2015). Genome sequences were repeat masked using RepeatMasker v4.0.5  
385 ([www.repeatmasker.org](http://www.repeatmasker.org)) if a repeat-masked version was not available. Only one end from  
386 paired-end read datasets were utilized in downstream processing. Reads were trimmed to be rid  
387 of low scoring ends and residual adaptor sequences using Trimmomatic v0.33 (LEADING:3  
388 TRAILING:3 SLIDINGWINDOW:4:20 MINLEN:20) (Bolger et al. 2014) and mapped to  
389 genome sequences using TopHat v2.0.13 (default parameters except as noted below) (Kim et al.  
390 2013). Reads  $\geq 20$  nucleotides in length that mapped uniquely within a genome were used in  
391 further analysis.

392 For each species, thirty million mapped reads were randomly selected from among all  
393 datasets and assembled into transcript fragments using Cufflinks v2.2.1 (default parameters  
394 except as noted below) (Trapnell et al. 2010), while correcting for sequence-specific biases  
395 during the sequencing process by providing an associated genome sequence with the -b flag. The  
396 expected mean fragment length for assembled transcript fragments in Cufflinks was set to 150  
397 from the default of 200 so that expression levels in short fragments would not be overestimated.  
398 The 1<sup>st</sup> and 99<sup>th</sup> percentile of intron lengths for each species were used as the minimum and  
399 maximum intron lengths, respectively, for both the TopHat2 and Cufflinks steps. Intergenic  
400 transcribed regions (ITRs) were defined by transcript fragments that did not overlap with gene  
401 annotation and did not have significant six-frame translated similarity to plant protein sequences  
402 in Phytozome v.10 (BLASTX E-value < 1E-05). The correlation between assembled genome

403 size and gene counts was determined with data from the first 50 published plant genomes  
404 (Michael and Jackson 2013).

#### 405 **Phenotype data sources**

406 Mutant phenotype data for *A. thaliana* protein-coding genes was collected from a  
407 published dataset (Lloyd and Meinke 2012), the Chloroplast 2010 database (Ajjawi et al. 2010;  
408 Savage et al. 2013), and the RIKEN phenome database (Kuromori et al. 2006) as described by  
409 Lloyd et al. (2015). Phenotype genes used in our analyses were those whose disruption resulted  
410 in lethal or visible defects under standard laboratory growth conditions. Genes with documented  
411 mutant phenotypes under standard conditions were considered as a distinct and non-overlapping  
412 category from other annotated protein-coding genes. We identified six RNA genes with  
413 documented loss-of-function phenotypes through literature searches (Supplementary Table 7):  
414 *At4* (AT5G03545) (Shin et al. 2006), *MIR164A* and *MIR164D* (AT2G47585 and AT5G01747,  
415 respectively) (Guo et al. 2005), *MIR168A* (AT4G19395) (W. Li et al. 2012), and *MIR828A* and  
416 *TAS4* (AT4G27765 and AT3G25795, respectively) (Hsieh et al. 2009). Conditional phenotype  
417 genes were those belonging to the Conditional phenotype group as described by Lloyd and  
418 Meinke (2012). Loss-of-function mutants of these genes exhibited phenotype only under stress  
419 conditions.

#### 420 **Arabidopsis thaliana genome annotation**

421 *A. thaliana* protein-coding gene, miRNA gene, snoRNA gene, snRNA gene, ncRNA  
422 region, pseudogene, and transposable element annotations were retrieved from The Arabidopsis  
423 Information Resource v.10 (TAIR10; [www.arabidopsis.org](http://www.arabidopsis.org)) (Berardini et al. 2015). Additional  
424 miRNA gene and lncRNA region annotations were retrieved from Araport v.11  
425 ([www.araport.org](http://www.araport.org)). A primary difference between the TAIR ncRNAs and Araport lncRNAs  
426 (referred to as Araport ncRNAs in the Results & Discussion section) is the date in which they  
427 were annotated. For example, 221 ncRNAs were present in the v.7 release of TAIR, which dates  
428 back to 2007 (TAIR10 contains 394 ncRNA annotations) (Swarbreck et al. 2008; Lamesch et al.  
429 2012; Berardini et al. 2015). However, Araport lncRNAs were annotated in the past five years  
430 (Krishnakumar et al. 2015). Thus, that TAIR ncRNAs are generally more highly and broadly  
431 expressed is likely a result of the less sensitive transcript identification methods available for  
432 early TAIR releases. A pseudogene-finding pipeline (Zou et al. 2009) was used to identify

433 additional pseudogene fragments and count the number of disabling mutations (premature stop or  
434 frameshift mutations). Genes, pseudogenes, and transposons with overlapping annotation were  
435 excluded from further analysis. Overlapping lncRNA annotations were merged for further  
436 analysis. When pseudogenes from TAIR10 and the pseudogene-finding pipeline overlapped, the  
437 longer pseudogene annotation was used.

438 *A. thaliana* ITRs analyzed include: (1) the Set 2 ITRs in Moghe et al. (Moghe et al.  
439 2013), (2) the novel transcribed regions from Araport v.11, and (3) additional ITRs from 206  
440 RNA-seq datasets (Supplementary Table 5). Reads were trimmed, mapped, and assembled into  
441 transcript fragments as described above, except that overlapping transcript fragments from across  
442 datasets were merged. ITRs analyzed did not overlap with any TAIR10, Araport11, or  
443 pseudogene annotation. Overlapping ITRs from different annotated subsets were kept based on a  
444 priority system: Araport11 > Set 2 ITRs from Moghe et al. (Moghe et al. 2013) > ITRs identified  
445 in this study. For each sequence entry (gene, ncRNA, pseudogene, transposable element, or  
446 ITR), a 100 and 500 base pair (bp) window was randomly chosen for calculating feature values  
447 and subsequent model building steps. Feature descriptions are provided in the following sections.  
448 The feature values for randomly selected 500 and 100 bp windows are provided in  
449 Supplementary Tables 2 and 6, respectively. Additionally, non-expressed intergenic sequences  
450 were randomly-sampled from genome regions that did not overlap with annotated genes,  
451 pseudogenes, transposable elements, or regions with genic or intergenic transcript fragments  
452 (100 bp, n=4,000; 500 bp, n=3,716). All 100 and 500 bp windows described above are referred  
453 to as sequence windows throughout the Methods section.

#### 454 **Sequence conservation and structure features**

455 There were 10 sequence conservation features examined. The first two were derived from  
456 comparisons between *A. thaliana* accessions including nucleotide diversity and Tajima's D  
457 among 81 accessions (Cao et al. 2011) using a genome matrix file from the 1,001 genomes  
458 database ([www.1001genomes.org](http://www.1001genomes.org)). The python scripts are available through GitHub  
459 (<https://github.com/ShiuLab/GenomeMatrixProcessing>). The remaining eight features were  
460 derived from cross-species comparisons, three based on multiple sequence and five based on  
461 pairwise alignments. Three multiple sequence alignment-based features were established using  
462 aligned genomic regions between *A. thaliana* and six other plant species (*Glycine max*,  
463 *Medicago truncatula*, *Populus trichocarpa*, *Vitis vinifera*, *Sorghum bicolor*, and *Oryza sativa*)

464 (F. Li et al. 2012), which are referred to as conserved blocks. For each conserved block, the first  
465 feature was the proportion of a sequence window that overlapped a conserved block (referred to  
466 as coverage), and the two other features were the maximum and average phastCons scores within  
467 each sequence window. The phastCons score was determined for each nucleotide within  
468 conserved blocks (F. Li et al. 2012). Nucleotides in a sequence window that did not overlap with  
469 a conserved block were assigned a phastCons score of 0. For each sequence window, five  
470 pairwise alignment-based cross-species conservation features were the percent identities to the  
471 most significant BLASTN match (if  $E\text{-value} < 1E\text{-}05$ ) in each of five taxonomic groups. The five  
472 taxonomic groups included the *Brassicaceae* family ( $n_{\text{species}}=7$ ), other dicotyledonous plants (22),  
473 monocotyledonous plants (7), other embryophytes (3), and green algae (5). If no sequence with  
474 significant similarity was present, percent identity was scored as zero.

475 For sequence-structure features, we used 125 conformational and thermodynamic  
476 dinucleotide properties collected from DiProDB database (Friedel et al. 2009). Because the  
477 number of dinucleotide properties was high and dependent, we reduced the dimensionality by  
478 utilizing principal component (PC) analysis as described previously (Tsai et al. 2015). Sequence-  
479 structure values corresponding to the first five PCs were calculated for all dinucleotides in and  
480 averaged across the length of a sequence window and used as features when building function  
481 prediction models.

## 482 **Transcription activity features**

483 We generated four multi-dataset and 20 individual dataset transcription activity features.  
484 To identify a set of RNA-seq datasets to calculate multi-dataset features, we focused on the 72 of  
485 206 RNA-seq datasets each with  $\geq 20$  million reads (see above; Supplementary Table 5).  
486 Transcribed regions were identified with TopHat2 and Cufflinks as described in the RNA-seq  
487 analysis section except that the 72 *A. thaliana* RNA-seq datasets were used. Following transcript  
488 assembly, we excluded 21 RNA-seq datasets because they had unusually high RPKM (Reads Per  
489 Kilobase of transcript per Million mapped reads) values (median RPKM value  
490  $\text{range}=272\sim 2,504,294$ ) compared to the rest ( $2\sim 252$ ). The remaining 51 RNA-seq datasets were  
491 used to generate four multi-dataset transcription activity features including: expression breadth,  
492 95<sup>th</sup> percentile expression level, maximum transcript coverage, and presence of expression  
493 evidence (for values see Supplementary Table 2, 6). Expression breadth was the number of  
494 RNA-seq datasets that have  $\geq 1$  transcribed region that overlapped with a sequence window. The

495 95<sup>th</sup> percentile expression level was the 95<sup>th</sup> percentile of RPKM values across 51 RNA-seq  
496 datasets where RPKM values were set to 0 if there was no transcribed region for a sequence  
497 window. Maximum transcript coverage was the maximum proportion of a sequence window that  
498 overlapped with a transcribed region across 51 RNA-seq datasets. Presence of expression  
499 evidence was determined by overlap between a sequence window and any transcribed region in  
500 the 51 RNA-seq datasets.

501 In addition to features based on multiple datasets, 20 individual dataset features were  
502 derived from 10 datasets: seven tissue/organ-specific RNA-seq datasets including pollen  
503 (SRR847501), seedling (SRR1020621), leaf (SRR953400), root (SRR578947), inflorescence  
504 (SRR953399), flower, (SRR505745) and silique (SRR953401), and three datasets from non-  
505 standard growth conditions, including dark-grown seedlings (SRR974751) and leaf tissue under  
506 drought (SRR921316) and fungal infection (SRR391052). For each of these 10 RNA-seq  
507 datasets, we defined two features for each sequence window: the maximum transcript coverage  
508 (as described above) and the maximum RPKM value of overlapping transcribed regions (referred  
509 to as Level in **Fig. 2**). If no transcribed regions overlapped a sequence window, the maximum  
510 RPKM value was set as 0. For the analysis of narrowly- and broadly-expressed phenotype genes  
511 and pseudogenes (Supplementary Fig. 3B,C), we used 28 out of 51 RNA-seq datasets generated  
512 from a single tissue and in standard growth conditions to calculate the number of tissues with  
513 evidence of expression (tissue expression breadth). In total, seven tissues were represented  
514 among the 28 selected RNA-seq datasets (see above; Supplementary Table 5), and thus tissue  
515 expression breadth ranges from 0 to 7 (note that only 1 through 7 are shown in Supplementary  
516 Fig. 3B,C due to low sample size of phenotype genes in the 0 bin). The tissue breadth value is  
517 distinct from the expression breadth feature used in model building that was generated using all  
518 51 datasets and considered multiple RNA-seq datasets from the same tissue separately (range: 0-  
519 51).

### 520 **Histone 3 mark features**

521 Twenty histone 3 (H3) mark features were calculated based on eight H3 chromatin  
522 immunoprecipitation sequencing (ChIP-seq) datasets from SRA. The H3 marks examined  
523 include four associated with activation (H3K4me1: SRR2001269, H3K4me3: SRR1964977,  
524 H3K9ac: SRR1964985, and H3K23ac: SRR1005405) and four associated with repression  
525 (H3K9me1: SRR1005422, H3K9me2: SRR493052, H3K27me3: SRR3087685, and H3T3ph:

526 SRR2001289). Reads were trimmed as described in the RNA-seq section and mapped to the  
527 TAIR10 genome with Bowtie v2.2.5 (default parameters) (Langmead et al. 2009). Spatial  
528 Clustering for Identification of ChIP-Enriched Regions v.1.1 (Xu et al. 2014) was used to  
529 identify ChIP-seq peaks with a false discover rate  $\leq 0.05$  with a non-overlapping window size of  
530 200, a gap parameter of 600, and an effective genome size of 0.92 (Koehler et al. 2011). For each  
531 H3 mark, two features were calculated for each sequence window: the maximum intensity  
532 among overlapping peaks and peak coverage (proportion of overlap with the peak that overlaps  
533 maximally with the sequence window). In addition, four multi-mark features were generated.  
534 Two of the multi-mark features were the number of activating marks (0-4) overlapping a  
535 sequence window and the proportion of a sequence window overlapping any peak from any of  
536 the four activating marks (activating mark peak coverage). The remaining two multi-mark  
537 features were the same as the two activating multi-mark features except focused on the four  
538 repressive marks.

### 539 **DNA methylation features**

540 Twenty-one DNA methylation features were calculated from bisulfite-sequencing (BS-  
541 seq) datasets from seven tissues (pollen: SRR516176, embryo: SRR1039895, endosperm:  
542 SRR1039896, seedling: SRR520367, leaf: SRR1264996, root: SRR1188584, and inflorescence:  
543 SRR2155684). BS-seq reads were trimmed as described above and processed with Bismark v.3  
544 (default parameters) (Krueger and Andrews 2011) to identify methylated and unmethylated  
545 cytosines in CG, CHH, and CHG (H = A, C, or T) contexts. Methylated cytosines were defined  
546 as those with  $\geq 5$  mapped reads and with  $>50\%$  of mapped reads indicating that the position was  
547 methylated. For each BS-seq dataset, the percentage of methylated cytosines in each sequence  
548 window for CG, CHG, and CHH contexts were calculated if the sequence window had  $\geq 5$   
549 cytosines with  $\geq 5$  reads mapping to the position. To determine whether the above parameters  
550 were reasonable, we assessed the false positive rate of DNA methylation calls by evaluating the  
551 proportion of cytosines in the chloroplast genome that are called as methylated, as the  
552 chloroplast genome has few DNA methylation events (Ngernprasirtsiri et al. 1988; Zhang et al.  
553 2006). Based on the above parameters, 0-1.5% of cytosines in CG, CHG, or CHH contexts in the  
554 chloroplast genome were considered methylated in any of the seven BS-seq datasets. This  
555 indicated that the false positive rates for DNA methylation calls were low and the parameters  
556 were reasonable.



## 557 **Chromatin accessibility and transcription factor binding features**

558 Chromatin accessibility features consisted of ten DHS-related features and one  
559 micrococcal nuclease sequencing (MNase-seq)-derived feature. DHS peaks from five tissues  
560 (seed coat, seedling, root, unopened flowers, and opened flowers) were retrieved from the Gene  
561 Expression Omnibus (GSE53322 and GSE53324) (Sullivan et al. 2014). For each of the five  
562 tissues, the maximum DHS peak intensity and DHS peak coverage were calculated for each  
563 sequence window. Normalized nucleosome occupancy per bp based on MNase-seq was obtained  
564 from Liu et al. (Liu et al. 2015). The average nucleosome occupancy value was calculated across  
565 each sequence window. Transcription factor (TF) binding site features were based on *in vitro*  
566 DNA affinity purification sequencing data of 529 TFs (O'Malley et al. 2016). Two features were  
567 generated for each sequence window: the total number of TF binding sites and the number of  
568 distinct TFs bound.

## 569 **Single-feature prediction performance**

570 The ability for each single feature to distinguish between functional and nonfunctional  
571 regions was evaluated by calculating AUC-ROC value with the Python scikit-learn package  
572 (Pedregosa et al. 2011). Thresholds to predict sequences as functional or nonfunctional using a  
573 single feature were defined by the feature value that produced the highest F-measure, the  
574 harmonic mean of precision (proportion of sequences predicted as functional that are truly  
575 functional) and recall (proportion of truly functional sequences predicted as functional). The F-  
576 measure allows consideration of both false positives and false negatives at a given threshold.  
577 FPR were calculated as the percentage of negative (nonfunctional) cases with values above or  
578 equal to the threshold and thus falsely predicted as functional. FNR were calculated as the  
579 percentage of positive (functional) cases with values below the threshold and thus falsely  
580 predicted as nonfunctional.

## 581 **Binary classification with machine learning**

582 For binary classification (two-class) models that contrasted phenotype genes and  
583 pseudogenes, the random forest (RF) implementation in the Waikato Environment for  
584 Knowledge Analysis software (WEKA) (Hall et al. 2009) was utilized. Three types of two-class  
585 models were established, including the full model (500 bp sequence window, **Fig. 3A,B** and **Fig.**  
586 **4**), tissue-agnostic models (500 bp, Supplementary Fig. 4; 100 bp, Supplementary Fig. 6), and

587 single feature category models (**Fig. 3A,B**). For each model type, we first generated 100  
588 balanced datasets by randomly selecting equal numbers of phenotype genes (positive examples)  
589 and pseudogenes (negative examples). For each of these 100 datasets, 10-fold stratified cross-  
590 validation was utilized, where the model was trained using 90% of sequences and tested on the  
591 remaining 10%. Thus, for each model type, a sequence window had 100 prediction scores, where  
592 each score was the proportion of 500 random forest trees that predicted a sequence as a  
593 phenotype gene in a balanced dataset. The median of 100 prediction scores was used as the  
594 functional likelihood (FL) value (Supplementary Table 4). The FL threshold to predict a  
595 sequence as functional or nonfunctional was defined based on maximum F-measure as described  
596 in the previous section.

597 We tested multiple -K parameters (2 to 25) in the WEKA-RF implementation, which  
598 alters the number of randomly-selected features included in each RF tree (Supplementary Table  
599 8), and found that 15 randomly-selected features provided the highest performance based on  
600 AUC-ROC (calculated and visualized using the ROCR package) (Sing et al. 2005). Feature  
601 importance was assessed by excluding one feature at a time to determine the associated reduction  
602 in prediction performance (Supplementary Table 9). All leave-one-out models performed well  
603 (AUC-ROC >0.97), indicating that no single feature was dominating the function predictions  
604 and/or many features are correlated (Supplementary Fig. 7). Binary classification models were  
605 also built using all features from 500 bp sequences (equivalent to the full model) with the  
606 Sequential Minimal Optimization - Support Vector Machine (SMO-SVM) implementation in  
607 WEKA (Hall et al. 2009). The results of SMO-SVM models were highly similar to the full RF  
608 results: *PCC* between the FL values generated by RF and SMO-SVM=0.97; AUC-ROC of  
609 SMO-SVM=0.97; FPR=12%; FNR=3%. By comparison, the full RF model had AUC-  
610 ROC=0.98, FPR=10%, FNR=4%.

611 Tissue-agnostic models were generated by excluding the expression breadth feature and  
612 95<sup>th</sup> percentile expression level and replacing all features from RNA-seq, BS-seq, and DHS  
613 datasets that were available in multiple tissues. For multiple-tissue RNA-seq data, the maximum  
614 expression level across 51 RNA-seq datasets (in RPKM) and maximum coverage (as described  
615 in the transcription activity section) of a sequence window in any of 51 RNA-seq datasets were  
616 used. For multi-tissue DNA methylation features, minimum proportions of methylated cytosines  
617 in any tissue in CG, CHG, and CHH contexts were used. For DHS data, the maximum peak

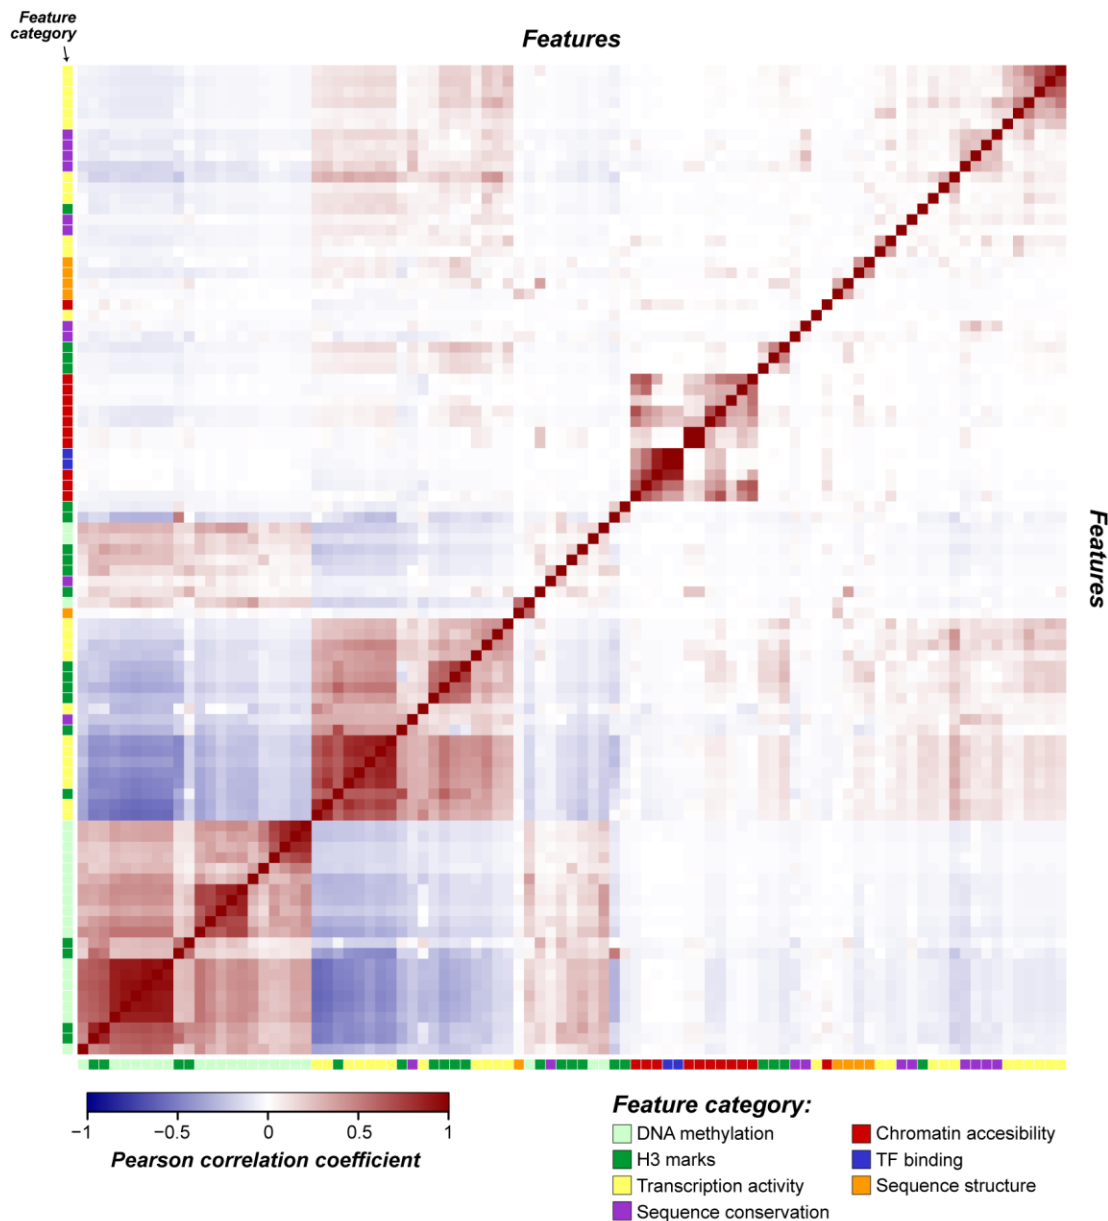

**Supplementary Figure 7.** Correlation between features used in functional predictions. Colors within the heatmap indicate pairwise correlation between two features. Colors on the left-most and bottom-most edges indicate the associated feature category (Fig. 2). Feature values were quantile normalized prior to calculating correlation.

618

619 intensity and peak coverage was used instead. In single feature category predictions, fewer total  
620 features were used and therefore lower  $-K$  values (i.e. the number of random features selected  
621 when building random forests) were considered in parameter searches (Supplementary Table 8).

622 **Multi-class machine learning model**

623 For the four-class model, benchmark RNA gene, phenotype protein-coding gene,  
624 pseudogene, and random unexpressed intergenic sequences were used as the four training  
625 classes. Benchmark RNA genes consisted of six RNA genes with documented loss-of-function  
626 phenotypes and 40 high-confidence miRNA genes from miRBase ([www.mirbase.org](http://www.mirbase.org))  
627 (Kozomara and Griffiths-Jones 2014). We considered that the decreased numbers of benchmark  
628 RNA genes would not allow us to effectively distinguish between sequence classes. However,  
629 binary predictions generated using 35 phenotype gene and pseudogene instances and the 100 bp  
630 tissue-agnostic feature set resulted in an AUC-ROC performance of 0.96. We generated 250  
631 datasets with equal proportions (larger classes randomly sampled) of training sequences. Two-  
632 fold stratified cross-validation was utilized due to the low number of benchmark RNA genes.  
633 The features included those described for the tissue-agnostic model and focused on 100 bp  
634 sequence windows. The RF implementation, *cforest*, in the *party* package of R (Strobl et al.  
635 2008) was used to build the classifiers. The four-class predictions provide prediction scores for  
636 each sequence type: an RNA gene, phenotype protein-coding gene, pseudogene, and unexpressed  
637 intergenic score (Supplementary Table 4). The prediction scores indicate the proportion of  
638 random forest trees that classify a sequence as a particular class. Median prediction scores from  
639 across 100 balanced runs were used as final prediction scores. Scores from a single balanced  
640 dataset models sum to 1, but not the median from 100 balanced runs. Thus, the median scores  
641 were scaled to sum to 1. For each sequence window, the maximum prediction score among the  
642 four classes was used to classify a sequence as phenotype gene, pseudogene, unexpressed  
643 intergenic region, or RNA gene.

## 644 **AVAILABILITY**

645 All relevant data are within the article and supplementary data files.

## 646 **SUPPLEMENTARY MATERIALS**

647 Supplementary Data are available online.

## 648 **ACKNOWLEDGEMENTS**

649 The authors wish to thank Christina Azodi, Ming-Jung Liu, Gaurav Moghe, Bethany Moore, and  
650 Sahra Uygun and for providing processed data and discussion. This work was supported by the  
651 National Science Foundation (grant numbers IOS-1126998, IOS-1546617, and DEB-1655386 to

652 S.H.S), and Research Experience for Undergraduates support [to R.P.S]; and the Michigan State  
653 University Dissertation Continuation Fellowship [to J.P.L].

## 654 **CONFLICT OF INTEREST**

655 The authors have no conflicts of interest to disclose.

## 656 **REFERENCES**

- 657 Ajjawi I, Lu Y, Savage LJ, Bell SM, Last RL. 2010. Large-scale reverse genetics in *Arabidopsis*:  
658 case studies from the Chloroplast 2010 Project. *Plant Physiol.* 152:529–540.
- 659 Amundson R, Lauder G V. 1994. Function without purpose. *Biol. Philos.* 9:443–469.
- 660 Berardini TZ, Reiser L, Li D, Mezheritsky Y, Muller R, Strait E, Huala E. 2015. The  
661 *Arabidopsis* information resource: Making and mining the “gold standard” annotated  
662 reference plant genome. *Genesis* 53:474–485.
- 663 Bernard D, Prasanth K V, Tripathi V, Colasse S, Nakamura T, Xuan Z, Zhang MQ, Sedel F,  
664 Jourden L, Couplier F, et al. 2010. A long nuclear-retained non-coding RNA regulates  
665 synaptogenesis by modulating gene expression. *EMBO J.* 29:3082–3093.
- 666 Boeck ME, Huynh C, Gevirtzman L, Thompson OA, Wang G, Kasper DM, Reinke V, Hillier  
667 LW, Waterston RH. 2016. The time-resolved transcriptome of *C. elegans*. *Genome Res.*  
668 26:1441–1450.
- 669 Bolger AM, Lohse M, Usadel B. 2014. Trimmomatic: a flexible trimmer for Illumina sequence  
670 data. *Bioinformatics* 30:2114–2120.
- 671 Brown JB, Boley N, Eisman R, May GE, Stoiber MH, Duff MO, Booth BW, Wen J, Park S,  
672 Suzuki AM, et al. 2014. Diversity and dynamics of the *Drosophila* transcriptome. *Nature*  
673 512:393–399.
- 674 Cao J, Schneeberger K, Ossowski S, Günther T, Bender S, Fitz J, Koenig D, Lanz C, Stegle O,  
675 Lippert C, et al. 2011. Whole-genome sequencing of multiple *Arabidopsis thaliana*  
676 populations. *Nat. Genet.* 43:956–963.
- 677 Doolittle WF, Brunet TDP, Linquist S, Gregory TR. 2014. Distinguishing between “function”  
678 and “effect” in genome biology. *Genome Biol. Evol.* 6:1234–1237.
- 679 Eddy SR. 2013. The ENCODE project: missteps overshadowing a success. *Curr. Biol.* 23:R259--  
680 61.
- 681 ENCODE Project Consortium. 2012. An integrated encyclopedia of DNA elements in the human

- 682 genome. *Nature* 489:57–74.
- 683 Fei Q, Xia R, Meyers BC. 2013. Phased, Secondary, Small Interfering RNAs in  
684 Posttranscriptional Regulatory Networks. *Plant Cell* 25:2400–2415.
- 685 Friedel M, Nikolajewa S, Sühnel J, Wilhelm T. 2009. DiProDB: a database for dinucleotide  
686 properties. *Nucleic Acids Res.* 37:D37--40.
- 687 Goodstein DM, Shu S, Howson R, Neupane R, Hayes RD, Fazo J, Mitros T, Dirks W, Hellsten  
688 U, Putnam N, et al. 2012. Phytozome: a comparative platform for green plant genomics.  
689 *Nucleic Acids Res.* 40:D1178-86.
- 690 Graur D, Zheng Y, Price N, Azevedo RBR, Zufall R a, Elhaik E. 2013. On the immortality of  
691 television sets: “function” in the human genome according to the evolution-free gospel of  
692 ENCODE. *Genome Biol. Evol.* 5:578–590.
- 693 Guil S, Esteller M. 2012. Cis-acting noncoding RNAs: friends and foes. *Nat. Struct. Mol. Biol.*  
694 19:1068–1075.
- 695 Gulko B, Gronau I, Hubisz MJ, Siepel A. 2014. Probabilities of Fitness Consequences for Point  
696 Mutations Across the Human Genome.
- 697 Guo H-S, Xie Q, Fei J-F, Chua N-H. 2005. MicroRNA directs mRNA cleavage of the  
698 transcription factor NAC1 to downregulate auxin signals for arabidopsis lateral root  
699 development. *Plant Cell* 17:1376–1386.
- 700 Hall M, Frank E, Holmes G, Pfahringer B, Reutemann P, Witten IH. 2009. The WEKA data  
701 mining software. *ACM SIGKDD Explor. Newsl.* 11:10.
- 702 Hardiman KE, Brewster R, Khan SM, Deo M, Bodmer R. 2002. The bereft gene, a potential  
703 target of the neural selector gene cut, contributes to bristle morphogenesis. *Genetics*  
704 161:231–247.
- 705 Hsieh L-C, Lin S-I, Shih AC-C, Chen J-W, Lin W-Y, Tseng C-Y, Li W-H, Chiou T-J. 2009.  
706 Uncovering small RNA-mediated responses to phosphate deficiency in Arabidopsis by deep  
707 sequencing. *Plant Physiol.* 151:2120–2132.
- 708 Karreth FA, Reschke M, Ruocco A, Ng C, Chapuy B, Léopold V, Sjöberg M, Keane TM, Verma  
709 A, Ala U, et al. 2015. The BRAF pseudogene functions as a competitive endogenous RNA  
710 and induces lymphoma in vivo. *Cell* 161:319–332.
- 711 Kellis M, Wold B, Snyder MP, Bernstein BE, Kundaje A, Marinov GK, Ward LD, Birney E,  
712 Crawford GE, Dekker J, et al. 2014. Defining functional DNA elements in the human



- 713 genome. *Proc. Natl. Acad. Sci. USA* 111:6131–6138.
- 714 Kim D, Pertea G, Trapnell C, Pimentel H, Kelley R, Salzberg SL. 2013. TopHat2: accurate  
715 alignment of transcriptomes in the presence of insertions, deletions and gene fusions.  
716 *Genome Biol.* 14:R36.
- 717 Koehler R, Issac H, Cloonan N, Grimmond SM. 2011. The uniqueome: a mappability resource  
718 for short-tag sequencing. *Bioinformatics* 27:272–274.
- 719 Kozomara A, Griffiths-Jones S. 2014. miRBase: annotating high confidence microRNAs using  
720 deep sequencing data. *Nucleic Acids Res.* 42:D68--73.
- 721 Krishnakumar V, Hanlon MR, Contrino S, Ferlanti ES, Karamycheva S, Kim M, Rosen BD,  
722 Cheng C-Y, Moreira W, Mock SA, et al. 2015. Araport: the Arabidopsis information portal.  
723 *Nucleic Acids Res.* 43:D1003--9.
- 724 Krueger F, Andrews SR. 2011. Bismark: a flexible aligner and methylation caller for Bisulfite-  
725 Seq applications. *Bioinformatics* 27:1571–1572.
- 726 Kuromori T, Wada T, Kamiya A, Yuguchi M, Yokouchi T, Imura Y, Takabe H, Sakurai T,  
727 Akiyama K, Hirayama T, et al. 2006. A trial of phenome analysis using 4000 *Ds*-insertional  
728 mutants in gene-coding regions of Arabidopsis. *Plant J.* 47:640–651.
- 729 Lai K-MV, Gong G, Atanasio A, Rojas J, Quispe J, Posca J, White D, Huang M, Fedorova D,  
730 Grant C, et al. 2015. Diverse Phenotypes and Specific Transcription Patterns in Twenty  
731 Mouse Lines with Ablated LincRNAs. *PLoS One* 10:e0125522.
- 732 Lamesch P, Berardini TZ, Li D, Swarbreck D, Wilks C, Sasidharan R, Muller R, Dreher K,  
733 Alexander DL, Garcia-Hernandez M, et al. 2012. The Arabidopsis Information Resource  
734 (TAIR): improved gene annotation and new tools. *Nucleic Acids Res.* 40:D1202-10.
- 735 Langmead B, Trapnell C, Pop M, Salzberg SL. 2009. Ultrafast and memory-efficient alignment  
736 of short DNA sequences to the human genome. *Genome Biol.* 10:R25.
- 737 Li F, Zheng Q, Vandivier LE, Willmann MR, Chen Y, Gregory BD. 2012. Regulatory impact of  
738 RNA secondary structure across the Arabidopsis transcriptome. *Plant Cell* 24:4346–4359.
- 739 Li W, Cui X, Meng Z, Huang X, Xie Q, Wu H, Jin H, Zhang D, Liang W. 2012. Transcriptional  
740 regulation of Arabidopsis MIR168a and argonaute1 homeostasis in abscisic acid and abiotic  
741 stress responses. *Plant Physiol.* 158:1279–1292.
- 742 Li W, Gojobori T, Nei M. 1981. Pseudogenes as a paradigm of neutral evolution. *Nature*.
- 743 Liu M-J, Seddon AE, Tsai ZT-Y, Major IT, Floer M, Howe GA, Shiu S-H. 2015. Determinants

- 744 of nucleosome positioning and their influence on plant gene expression. *Genome Res.*  
745 25:1182–1195.
- 746 Lloyd J, Meinke D. 2012. A comprehensive dataset of genes with a loss-of-function mutant  
747 phenotype in *Arabidopsis*. *Plant Physiol.* 158:1115–1129.
- 748 Lloyd JP, Seddon AE, Moghe GD, Simenc MC, Shiu S-H. 2015. Characteristics of Plant  
749 Essential Genes Allow for within- and between-Species Prediction of Lethal Mutant  
750 Phenotypes. *Plant Cell* 27:2133–2147.
- 751 Marahrens Y, Panning B, Dausman J, Strauss W, Jaenisch R. 1997. Xist-deficient mice are  
752 defective in dosage compensation but not spermatogenesis. *Genes Dev.* 11:156–166.
- 753 Michael TP, Jackson S. 2013. The First 50 Plant Genomes. *Plant Genome* 6:0.
- 754 Moghe GD, Lehti-Shiu MD, Seddon AE, Yin S, Chen Y, Juntawong P, Brandizzi F, Bailey-  
755 Serres J, Shiu S-H. 2013. Characteristics and significance of intergenic polyadenylated  
756 RNA transcription in *Arabidopsis*. *Plant Physiol.* 161:210–224.
- 757 Nagalakshmi U, Wang Z, Waern K, Shou C, Raha D, Gerstein M, Snyder M. 2008. The  
758 Transcriptional Landscape of the Yeast Genome Defined by RNA Sequencing. *Science*  
759 320:1344–1349.
- 760 Neander K. 1991. Functions as selected effects: The conceptual analyst's defense. *Philos. Sci.*  
761 58:168–184.
- 762 Ngernprasirtsiri J, Kobayashi H, Akazawa T. 1988. DNA methylation as a mechanism of  
763 transcriptional regulation in nonphotosynthetic plastids in plant cells. *Proc. Natl. Acad. Sci.*  
764 U. S. A. 85:4750–4754.
- 765 Ning S, Wang P, Ye J, Li X, Li R, Zhao Z, Huo X, Wang L, Li F, Li X. 2013. A global map for  
766 dissecting phenotypic variants in human lincRNAs. *Eur. J. Hum. Genet.* 21:1128–1133.
- 767 Niu D-K, Jiang L. 2013. Can ENCODE tell us how much junk DNA we carry in our genome?  
768 *Biochem. Biophys. Res. Commun.* 430:1340–1343.
- 769 Nobuta K, Venu RC, Lu C, Beló A, Vemaraju K, Kulkarni K, Wang W, Pillay M, Green PJ,  
770 Wang G-L, et al. 2007. An expression atlas of rice mRNAs and small RNAs. *Nat.*  
771 *Biotechnol.* 25:473–477.
- 772 O'Malley RC, Huang S-SC, Song L, Lewsey MG, Bartlett A, Nery JR, Galli M, Gallavotti A,  
773 Ecker JR. 2016. Cistrome and Epicistrome Features Shape the Regulatory DNA Landscape.  
774 *Cell* 166:1598.

- 775 Pedregosa F, Varoquaux G, Gramfort A, Michel V, Thirion B, Grisel O, Blondel M, Prettenhofer  
776 P, Weiss R, Dubourg V, et al. 2011. Scikit-learn: Machine Learning in Python. *J. Mach.*  
777 *Learn. Res.* 12:2825–2830.
- 778 Penny GD, Kay GF, Sheardown SA, Rastan S, Brockdorff N. 1996. Requirement for Xist in X  
779 chromosome inactivation. *Nature* 379:131–137.
- 780 Poliseno L, Salmena L, Zhang J, Carver B, Haveman WJ, Pandolfi PP. 2010. A coding-  
781 independent function of gene and pseudogene mRNAs regulates tumour biology. *Nature*  
782 465:1033–1038.
- 783 Ponting CP, Belgard TG. 2010. Transcribed dark matter: meaning or myth? *Hum. Mol. Genet.*  
784 19:R162-8.
- 785 Sauvageau M, Goff LA, Lodato S, Bonev B, Groff AF, Gerhardinger C, Sanchez-Gomez DB,  
786 Hacısuleyman E, Li E, Spence M, et al. 2013. Multiple knockout mouse models reveal  
787 lincRNAs are required for life and brain development. *Elife* 2:e01749.
- 788 Savage LJ, Imre KM, Hall DA, Last RL. 2013. Analysis of essential Arabidopsis nuclear genes  
789 encoding plastid-targeted proteins. *PLoS One* 8:e73291.
- 790 Schreiber SL, Bernstein BE. 2002. Signaling Network Model of Chromatin. *Cell* 111:771–778.
- 791 Shin H, Shin H-S, Chen R, Harrison MJ. 2006. Loss of At4 function impacts phosphate  
792 distribution between the roots and the shoots during phosphate starvation. *Plant J.* 45:712–  
793 726.
- 794 Simon SA, Meyers BC. 2011. Small RNA-mediated epigenetic modifications in plants. *Curr.*  
795 *Opin. Plant Biol.* 14:148–155.
- 796 Sing T, Sander O, Beerenwinkel N, Lengauer T. 2005. ROCr: visualizing classifier performance  
797 in R. *Bioinformatics* 21:3940–3941.
- 798 Stolc V, Samanta MP, Tongprasit W, Sethi H, Liang S, Nelson DC, Hegeman A, Nelson C,  
799 Rancour D, Bednarek S, et al. 2005. Identification of transcribed sequences in Arabidopsis  
800 thaliana by using high-resolution genome tiling arrays. *Proc. Natl. Acad. Sci. U. S. A.*  
801 102:4453–4458.
- 802 Strobl C, Boulesteix A-L, Kneib T, Augustin T, Zeileis A. 2008. Conditional variable  
803 importance for random forests. *BMC Bioinformatics* 9:307.
- 804 Struhl K. 2007. Transcriptional noise and the fidelity of initiation by RNA polymerase II. *Nat.*  
805 *Struct. Mol. Biol.* 14:103–105.

- 806 Sullivan AM, Arsovski AA, Lempe J, Bubb KL, Weirauch MT, Sabo PJ, Sandstrom R, Thurman  
807 RE, Neph S, Reynolds AP, et al. 2014. Mapping and dynamics of regulatory DNA and  
808 transcription factor networks in *A. thaliana*. *Cell Rep.* 8:2015–2030.
- 809 Svensson O, Arvestad L, Lagergren J. 2006. Genome-wide survey for biologically functional  
810 pseudogenes. *PLoS Comput. Biol.* 2:e46.
- 811 Swarbreck D, Wilks C, Lamesch P, Berardini TZ, Garcia-hernandez M, Foerster H, Li D, Meyer  
812 T, Muller R, Ploetz L, et al. 2008. The Arabidopsis Information Resource (TAIR): gene  
813 structure and function annotation. *Nucleic Acids Res.* 36:1009–1014.
- 814 Tan JY, Sirey T, Honti F, Graham B, Piovesan A, Merkschlager M, Webber C, Ponting CP,  
815 Marques AC. 2015. Extensive microRNA-mediated crosstalk between lncRNAs and  
816 mRNAs in mouse embryonic stem cells. *Genome Res.* 25:655–666.
- 817 Trapnell C, Williams BA, Pertea G, Mortazavi A, Kwan G, van Baren MJ, Salzberg SL, Wold  
818 BJ, Pachter L. 2010. Transcript assembly and quantification by RNA-Seq reveals  
819 unannotated transcripts and isoform switching during cell differentiation. *Nat. Biotechnol.*  
820 28:511–515.
- 821 Tsai ZT-Y, Lloyd JP, Shiu S-H. 2017. Defining Functional Genic Regions in the Human  
822 Genome through Integration of Biochemical, Evolutionary, and Genetic Evidence. *Mol.*  
823 *Biol. Evol.*
- 824 Tsai ZT-Y, Shiu S-H, Tsai H-K. 2015. Contribution of Sequence Motif, Chromatin State, and  
825 DNA Structure Features to Predictive Models of Transcription Factor Binding in Yeast.  
826 *PLoS Comput. Biol.* 11:e1004418.
- 827 VanBuren R, Bryant D, Edger PP, Tang H, Burgess D, Challabathula D, Spittle K, Hall R, Gu J,  
828 Lyons E, et al. 2015. Single-molecule sequencing of the desiccation-tolerant grass  
829 *Oropetium thomaeum*. *Nature* 527:508–511.
- 830 Wang Z, Zang C, Rosenfeld JA, Schones DE, Barski A, Cuddapah S, Cui K, Roh T-Y, Peng W,  
831 Zhang MQ, et al. 2008. Combinatorial patterns of histone acetylations and methylations in  
832 the human genome. *Nat. Genet.* 40:897–903.
- 833 Xu S, Grullon S, Ge K, Peng W. 2014. Spatial clustering for identification of ChIP-enriched  
834 regions (SICER) to map regions of histone methylation patterns in embryonic stem cells.  
835 *Methods Mol. Biol.* 1150:97–111.
- 836 Yamada K, Lim J, Dale JM, Chen H, Shinn P, Palm CJ, Southwick AM, Wu HC, Kim C,

837 Nguyen M, et al. 2003. Empirical analysis of transcriptional activity in the Arabidopsis  
838 genome. *Science* 302:842–846.

839 Yang L, Takuno S, Waters ER, Gaut BS. 2011. Lowly expressed genes in *Arabidopsis thaliana*  
840 bear the signature of possible pseudogenization by promoter degradation. *Mol. Biol. Evol.*  
841 28:1193–1203.

842 Zhang X, Yazaki J, Sundaresan A, Cokus S, Chan SW-L, Chen H, Henderson IR, Shinn P,  
843 Pellegrini M, Jacobsen SE, et al. 2006. Genome-wide high-resolution mapping and  
844 functional analysis of DNA methylation in *Arabidopsis*. *Cell* 126:1189–1201.

845 Zhao Y, Li H, Fang S, Kang Y, Wu W, Hao Y, Li Z, Bu D, Sun N, Zhang MQ, et al. 2016.  
846 NONCODE 2016: an informative and valuable data source of long non-coding RNAs.  
847 *Nucleic Acids Res.* 44:D203--8.

848 Zou C, Lehti-Shiu MD, Thibaud-Nissen F, Prakash T, Buell CR, Shiu S-H. 2009. Evolutionary  
849 and expression signatures of pseudogenes in *Arabidopsis* and rice. *Plant Physiol.* 151:3–15.  
850

## 851 **FIGURE LEGENDS**

852 **Figure 1.** Relationship between genome size and number of nucleotides covered by RNA-seq  
853 reads (expression) in 15 flowering plant species. **(A)** annotated genic regions. **(B)** intergenic  
854 regions. Transcribed regions were considered as intergenic if they did not overlap with any gene  
855 annotation and had no significant translated sequence similarity to plant protein sequences.  
856 Identical numbers of RNA-sequencing reads (30 million) and the same mapping procedures were  
857 used in all species. Mb: megabase. Gb: gigabase. Dotted lines: linear model fits.  $r^2$ : square of  
858 Pearson's correlation coefficient.

859 **Figure 2.** Predictions of functional (phenotype gene) and non-functional (pseudogene) sequences  
860 based on each individual feature. Prediction performance is measured using Area Under the  
861 Curve - Receiver Operating Characteristic (AUC-ROC). AUC-ROC values range between 0.5  
862 (random) and 1 (perfect separation), with AUC-ROC values of 0.7, 0.8, and 0.9 considered fair,  
863 good, and excellent performance, respectively. Features include those in the categories of **(A)**  
864 transcription activity, **(B)** sequence conservation, **(C)** DNA methylation, **(D)** transcription factor  
865 (TF) binding, **(E)** histone 3 (H3) marks, **(F)** sequence structure, and **(G)** chromatin accessibility.

866 AUC-ROC ranges in value from 0.5 (equivalent to random guessing) to 1 (perfect predictions).  
867 Dotted lines: median AUC-ROC of features in a category.

868 **Figure 3.** Predictions of functional and nonfunctional sequences based on multiple features. **(A)**  
869 AUC-ROC values of function prediction models built when considering all features (Full), all  
870 except transcription activity (TX)-related features (Full (-TX)), and all features from each  
871 category. The category abbreviations follow those in **Fig. 2.** **(B)** Precision-recall curves of the  
872 models with matching colors from **(A)**. The models were built using feature values calculated  
873 from 500 bp sequence windows. We also conducted principle component (PC) analysis to  
874 investigate how well phenotype genes and pseudogenes could be separated and found that  
875 phenotype genes (Supplementary Fig. 1A) and pseudogenes (Supplementary Fig. 1B) were  
876 distributed in largely distinct space. However, there remained substantial overlap, indicating that  
877 standard parametric approaches are not well suited to distinguishing between benchmark  
878 functional and nonfunctional sequences.

879 **Figure 4.** Functional likelihood distributions of various sequence classes based on the full  
880 model. **(A)** Phenotype genes. **(B)** Pseudogenes. **(C)** Annotated protein-coding genes. **(D)**  
881 Transposable elements. **(E)** Random unexpressed intergenic sequences. **(F)** Intergenic  
882 transcribed regions (ITR). **(G)** Araport11 ncRNAs. **(H)** TAIR10 ncRNAs. The full model was  
883 established using 500 bp sequence windows. Higher and lower functional likelihood values  
884 indicate greater similarity to phenotype genes and pseudogenes, respectively. Vertical dashed  
885 lines indicate the threshold for calling a sequence as functional or nonfunctional. The  
886 percentages to the left and right of the dashed line indicate the percent of sequences predicted as  
887 functional or nonfunctional, respectively.

888 **Figure 5.** Proportion of phenotype genes, pseudogenes, ITRs, and ncRNAs predicted as  
889 functional in the full and single-category models. Percentages of sequence classes that are  
890 predicted as functional in models based on all features and the single category models, each  
891 using all features from a category (abbreviated according to **Fig. 2**). The models are sorted from  
892 left to right based on performance (AUC-ROC). The colors of and numbers within the blocks  
893 indicate the proportion sequences predicted as functional by a given model. Phenotype gene and  
894 pseudogene sequences are shown in three sub-groups: all sequences (All), and those predicted as



895 functional (high functional likelihood (FL)) and nonfunctional (low FL) in the full model. ITR:  
896 intergenic transcribed regions. A greater proportion of ITRs and Araport ncRNAs are predicted  
897 as functional when considering only DNA methylation or H3 mark features compared to the full  
898 (**Fig. 3**) or tissue-agnostic (Supplementary Fig. 4) models. However, these two category-specific  
899 models also had higher false positive rates (unexpressed intergenic sequences and pseudogenes).  
900 Thus, these single feature-category models do not provide additional support for the functionality  
901 of most Araport ncRNAs and ITRs.

902 **Figure 6.** Function predictions based on a four-class prediction model. (**A**) Stacked bar plots  
903 indicate the prediction scores of benchmark RNA genes for each of the four classes: dark blue -  
904 phenotype protein-coding gene (Ph), cyan - RNA gene (RNA), red - pseudogene (Ps), yellow -  
905 random intergenic sequence (Ig). Ig were included to provide another set of likely nonfunctional  
906 sequences distinct from pseudogenes. Expression breadth and tissue-specific features were  
907 excluded and 100 bp sequences were used. A benchmark RNA gene is classified as one of the  
908 four classes according to the highest prediction score. The color bars below the chart indicate the  
909 predicted class, with the same color scheme as the prediction score. Sequences classified as Ph or  
910 RNA were considered functional, while those classified as Ps or Ig were considered  
911 nonfunctional. Percentages below a classification region indicate the proportion of sequences  
912 classified as that class. (**B**) Phenotype protein-coding gene prediction scores. (**C**) Pseudogene  
913 prediction scores. (**D**) Random unexpressed intergenic region prediction scores. Note that no  
914 sequence was predicted as functional. (**E**) Intergenic transcribed region (ITR), (**F**) Araport11  
915 ncRNA regions. (**G**) TAIR10 ncRNA regions. Note that the 100 bp model used here allowed us  
916 to evaluate an additional 10,938 ITRs and 1,406 annotated ncRNAs compared to the 500 bp full  
917 and tissue-agnostic models.

## 918 SUPPLEMENTARY FIGURE LEGENDS

919 **Supplementary Figure 1.** Smoothed scatterplots of the first two principle components (PCs) of  
920 (**A**) phenotype gene and (**B**) pseudogene features. The percentages on the axes in (**A**) indicate the  
921 feature value variation explained by the associated PC.

922 **Supplementary Figure 2.** Distributions of 12 example features from (**A**) transcription activity,  
923 (**B**) sequence conservation, (**C**) histone 3 (H3) marks, (**D**) DNA methylation, (**E**) transcription  
924 factor (TF) binding, (**F**) sequence structure, and (**G**) chromatin accessibility feature categories

925 (Fig. 2). Feature distributions are shown for phenotype genes, pseudogenes, TAIR- and Araport-  
926 annotated ncRNAs and intergenic transcribed regions (ITR).

927 **Supplementary Figure 3.** Impacts of conditional phenotypes and expression breadth on the  
928 function prediction model. (A) Functional likelihood distributions of phenotype genes with  
929 mutant phenotypes under standard growth conditions (non-conditional) and non-standard growth  
930 conditions such as stressful environments (conditional) based on the 500 bp full model. Feature  
931 values were calculated from a random 500 bp region from within the sequence body. Higher and  
932 lower functional likelihood values indicate a greater similarity to phenotype genes and  
933 pseudogenes, respectively. (B,C) Distributions of functional likelihood scores for phenotype  
934 genes (blue) and pseudogenes (red) for sequences with various breadths of expression for (B) the  
935 500 bp full model and (C) the 500 bp tissue-agnostic model generated by excluding the  
936 expression breadth and features available from multiple tissues. The tissue-agnostic model is  
937 aimed toward minimizing the effects of biochemical activity occurring across multiple tissues  
938 and predicts a greater proportion of narrowly-expressed phenotype genes as functional compared  
939 to the full model.

940 **Supplementary Figure 4.** Distributions of functional likelihood scores based on the 500 bp  
941 tissue-agnostic model. (A) Phenotype genes. (B) Pseudogenes. (C) Annotated protein-coding  
942 genes. (D) Transposable elements. (E) Random unexpressed intergenic sequences. (F) Intergenic  
943 transcribed regions (ITR). (G) Araport11 ncRNAs. (H) TAIR10 ncRNAs. Vertical dashed lines  
944 display the threshold to define a sequence as functional or nonfunctional. The numbers to the left  
945 and right of the dashed line show the percentage of sequences predicted as functional or  
946 nonfunctional, respectively.

947 **Supplementary Figure 5.** Distance of ITRs and annotated ncRNA regions to and feature  
948 similarity with neighboring genes. (A) Distance from intergenic transcribed regions (ITRs) and  
949 annotated ncRNAs to the closest neighboring gene. ITR and ncRNA sequences are separated by  
950 whether they are predicted as functional (F) or nonfunctional (NF) by the 500 bp full model. (B)  
951 Feature similarity between proximal neighbors (within 95th percentile (456 bp) of intron  
952 lengths), and (C) distal neighbors (>456 bp). Pairs involving ITRs and annotated ncRNAs were  
953 divided by whether the ITR or ncRNA sequence was predicted as functional (F) or nonfunctional

954 (NF) by the full model. Feature values were quantile normalized prior to calculating correlations.  
955 (D) Feature similarity based on Pearson's Correlation Coefficients (PCC) between random pairs  
956 of ITRs, Araport11 ncRNAs, TAIR10 ncRNAs, or annotated genes.

957 **Supplementary Figure 6.** Distributions of functional likelihood scores based on the 100 bp  
958 tissue-agnostic model. (A) Phenotype genes. (B) Pseudogenes. (C) Protein-coding gene. (D)  
959 transposable elements. (E) Random unexpressed intergenic sequences. (F) Intergenic transcribed  
960 regions (ITR). (G) Araport11 ncRNAs. (H) TAIR10 ncRNAs. (I) RNA genes with loss-of-  
961 function mutant phenotypes. (J) MicroRNAs, (K) Small nucleolar RNAs, (L) Small nuclear  
962 RNAs. The tissue-agnostic model was built with 100 bp features and while excluding the  
963 expression breadth and tissue-specific features as annotated RNA genes tend to be more  
964 narrowly expressed than phenotype genes (U tests, all  $p < 2e-05$ ; Supplementary Fig. 2A).  
965 Higher functional likelihood values indicate greater similarity to phenotype genes while lower  
966 values indicate similarity to pseudogenes. Vertical dashed lines display the threshold to define a  
967 sequence as functional or nonfunctional. The numbers to the left and right of the dashed line  
968 show the percentage of sequences predicted as functional or nonfunctional, respectively.

969 **Supplementary Figure 7.** Correlation between features used in functional predictions. Colors  
970 within the heatmap indicate pairwise correlation between two features. Colors on the left-most  
971 and bottom-most edges indicate the associated feature category (Fig. 2). Feature values were  
972 quantile normalized prior to calculating correlation.

## 973 **SUPPLEMENTARY TABLES**

974 **Supplementary Table 1.** Leaf tissue RNA-sequencing datasets for 15 flowering plant species

975 **Supplementary Table 2.** Conservation, biochemical, and sequence-structure feature values  
976 calculated from 500 bp sequences.

977 **Supplementary Table 3.** False positive and false negative rates for single feature classifications.

978 **Supplementary Table 4.** Function predictions for all models generated in this study.

979 **Supplementary Table 5.** RNA-sequencing datasets for identifying intergenic transcribed  
980 regions, calculating transcription activity features, and assessing tissue-specific predictions.

981 **Supplementary Table 6.** Conservation, biochemical, and sequence-structure feature values  
982 calculated from 100 bp sequences.

983 **Supplementary Table 7.** RNA genes with documented loss-of-function phenotypes.

984 **Supplementary Table 8.** K parameters tested for random forest runs.

985 **Supplementary Table 9.** AUC-ROC scores from leave-one-feature-out machine learning runs.

## 986 **SUPPLEMENTARY INFORMATION**

### 987 **Variability in single feature performance within feature categories**

988 Within each feature category, there was a wide range of performance between features (**Fig. 2,**  
989 Supplementary Table 3) and there were clear biological or technical explanations for features  
990 that perform poorly. For the transcription activity category, 17 out of 24 features had an AUC-  
991 ROC performance  $>0.8$ , including the best-performing feature, expression breadth (AUC-  
992 ROC=0.95; **Fig. 2A**). However, five transcription activity-related features performed poorly  
993 (AUC-ROC $<0.65$ ), including the presence of expression (transcript) evidence (AUC-ROC=0.58;  
994 **Fig. 2A**). For the sequence conservation category, maximum and average phastCons  
995 conservation scores were highly distinct between phenotype genes and pseudogenes (AUC-  
996 ROC=0.83 and 0.82, respectively; **Fig. 2B**). On the other hand, identity to best matching  
997 nucleotide sequences found in *Brassicaceae* and algal species were not informative (AUC-  
998 ROC=0.55 and 0.51, respectively; **Fig. 2B**). This was because 99.8% and 95% of phenotype  
999 genes and pseudogenes, respectively, had a potentially homologous sequence within the  
1000 *Brassicaceae* family, and only 3% and 1%, respectively, in algal species. Thus, *Brassicaceae*  
1001 genomes were too similar and algal genomes too dissimilar to *A. thaliana* to provide meaningful  
1002 information. H3 mark features also displayed high variability. The most informative H3 mark  
1003 features were based on the number and coverage of activation-related marks (AUC-ROC=0.87  
1004 and 0.85, respectively; **Fig. 2E**), consistent with the notion that histone marks are often jointly  
1005 associated with active genomic sequences to provide a robust regulatory signal (Schreiber and  
1006 Bernstein 2002; Wang et al. 2008). By comparison, the coverage and intensity of H3 lysine 27  
1007 trimethylation (H3K27me3) and H3 threonine 3 phosphorylation (H3T3ph) were largely  
1008 indistinct between phenotype genes and pseudogenes (AUC-ROC range: 0.55-0.59; **Fig. 2E**).

## 1009 **Error rates from single-feature functional predictions**

1010 The differences between genes and pseudogenes in transcription, conservation, and epigenetic  
1011 features and functional genomic regions suggested that these features may individually provide  
1012 sufficient information for distinguishing between functional and nonfunctional genomic regions.  
1013 To assess this possibility, we next evaluated the error rates of function predictions based on  
1014 single features. We first considered expression breadth of a sequence, the best predicting single  
1015 feature of functionality. Despite high AUC-ROC (0.95; **Fig. 2A**), the false positive rate (FPR; %  
1016 of pseudogenes predicted as phenotype genes) was 21% when only expression breadth was used,  
1017 while the false negative rate (FNR; % of phenotype genes predicted as pseudogenes) was 4%.  
1018 Similarly, the best-performing H3 mark- and sequence conservation-related features (**Fig. 2B,E**)  
1019 had FPRs of 26% and 32%, respectively, and also incorrectly classified at least 10% of  
1020 phenotype genes as pseudogenes. Thus, error rates are high even when considering well-  
1021 performing single features, indicating the need to jointly consider multiple features for  
1022 distinguishing phenotype genes and pseudogenes.

## 1023 **Features of misclassified sequences**

1024 Although the full model performs exceedingly well, there remain false predictions. There are 76  
1025 phenotype genes (4%) predicted as nonfunctional (referred to as low-functional likelihood (FL)  
1026 phenotype genes). We assessed why these phenotype genes were not correctly identified by first  
1027 asking what category of features were particularly distinct between low-FL and the remaining  
1028 phenotype genes. We found that the major category that led to the misclassification of phenotype  
1029 genes was transcription activity, as only 7% of low-scoring phenotype genes were predicted as  
1030 functional in the transcription activity-only model, compared to 98% of high FL phenotype genes  
1031 (**Fig. 5**). By contrast, >65% of low-FL phenotype genes were predicted as functional when  
1032 sequence conservation, H3 mark, or DNA methylation features were used. This could suggest  
1033 that the full model is less effective in predicting functional sequences that are weakly or  
1034 narrowly expressed. While sequence conservation features are distinct between functional and  
1035 nonfunctional sequences when considered in combination, a significantly higher proportion of  
1036 low-FL phenotype genes were specific to the *Brassicaceae* family, with only 33% present in  
1037 dicotyledonous species outside of the *Brassicaceae*, compared to 78% of high-scoring phenotype

1038 genes (FET,  $p < 4e-12$ ), thus our model likely has reduced power in detecting lineage-specific  
1039 sequences.

1040 We also predict 80 pseudogenes (10%) to be functional (high-FL pseudogenes). A  
1041 significantly higher proportion of high-FL pseudogenes came from existing genome annotation  
1042 as 19% of annotated pseudogenes were classified as functional, compared to 4% of pseudogenes  
1043 identified through a computational pipeline (FET,  $p < 1.5E-10$ ) (Zou et al. 2009). We found that  
1044 high-FL pseudogenes might be more recently pseudogenized and thus have not yet lost many  
1045 genic signatures, as the mean number of disabling mutations (premature stop or frameshift) per  
1046 kb in high-scoring pseudogenes (1.9) were significantly lower than that of low-scoring  
1047 pseudogenes (4.0; U test,  $p < 0.02$ ). Lastly, we cannot rule out the possibility that a small subset  
1048 of high-scoring pseudogenes represent truly functional sequences, rather than false positives  
1049 (Poliseno et al. 2010; Karreth et al. 2015). Overall, the misclassification of both narrowly-  
1050 expressed phenotype genes and broadly-expressed pseudogenes highlights the need for an  
1051 updated prediction model that is less influenced by expression breadth.

1052 Among protein-coding genes without phenotype information, we predict 20% as  
1053 nonfunctional. We expect that at least 4% represent false negatives based on the FNR of the full  
1054 model. The actual FNR among protein-coding genes may be higher, however, as phenotype  
1055 genes represent a highly active and well conserved subset of all genes. However, a subset of the  
1056 low-scoring protein-coding genes may also represent gene sequences undergoing functional  
1057 decay and *en route* to pseudogene status. To assess this possibility, we examined 1,940 *A.*  
1058 *thaliana* "decaying" genes that may be experiencing pseudogenization due to promoter  
1059 disablement (Yang et al. 2011) and found that, while these decaying genes represented only 7%  
1060 of all *A. thaliana* annotated protein-coding genes, they made up 45% of protein-coding genes  
1061 predicted as nonfunctional (Fisher's Exact Test (FET),  $p < 1E-11$ ).

### 1062 **Feature correlation between likely-functional ITRs and ncRNAs and their neighboring** 1063 **genes**

1064 ITRs and annotated ncRNAs closer to annotated genes tended to be predicted as functional  
1065 (Supplementary Fig. 5A), as 57% of likely functional and 35% of likely nonfunctional ITRs and  
1066 ncRNAs were proximal to neighboring genes (within the 95<sup>th</sup> percentile of intron lengths for all  
1067 genes) (FET,  $p < 2E-09$ ). Likely functional ITRs and annotated ncRNAs that are proximal to  
1068 genes may frequently represent unannotated exon extensions. If this is the case, it may be



1069 expected that such sequences would exhibit similar features as gene neighbors. However, no  
1070 clear pattern of increased feature correlation was observed between likely functional ITRs /  
1071 ncRNAs and neighboring genes when compared to likely non-functional ITRs / ncRNAs or  
1072 random sequence pairs, regardless of proximity (Supplementary Fig. 5B-D). Thus, despite their  
1073 proximity to annotated genes, it remains unclear if some ITRs or annotated ncRNAs represent  
1074 unannotated exon extensions of known genes or not. In addition, for proximal functional  
1075 ITRs/annotated ncRNAs, we cannot rule out the possibility that they represent false-positive  
1076 functional predictions due to the accessible and active chromatin states of nearby genes. Given  
1077 the challenge in ascertaining the origin of likely functional, proximal ITRs/ncRNAs, we instead  
1078 conservatively estimate that 187 distal, functional ITRs and annotated ncRNAs may represent  
1079 fragments of novel genes.

1080
